# Supplementary material for: QM and ONIOM studies on thermally activated delayed fluorescence of copper(i) complexes in gas phase, solution, and crystal
Source: Royal Society of Chemistry journal article supplement (doi:10.1039/c8cp03657h), 2018-01-01
Supplement: c8cp03657h1.pdf [file c8cp03657h1.pdf]

# Supplementary Information: QM and ONIOM Studies on Thermally Activated Delayed Fluorescence of Copper(I) Complexes in Gas Phase, Solution, and Crystal

Yuan-Jun Gao, Wen-Kai Chen, Zi-Rui Wang, Wei-Hai Fang, and Ganglong Cui\*

Key Laboratory of Theoretical and Computational Photochemistry, Ministry of Education,  
Chemistry College, Beijing Normal University, Beijing 100875, P. R. China

E-mail: [ganglong.cui@bnu.edu.cn](mailto:ganglong.cui@bnu.edu.cn)

## Table of Contents

1. **Table S1.** Key geometric parameters of complexes **1** and **2** in the gas phase, solution, and crystal (length in Å and angles in °). .....S3
2. **Table S2.** Key geometric parameters of ground state structures optimized by different basis sets for complexes **1** in crystal (length in Å and angles in °). .....S4
3. **Figure S1.** Key geometric parameters at the equilibrium geometries of the  $S_0$ ,  $S_1$ , and  $T_1$  states for **2** in the gas phase, solution and crystal. Left: bond lengths (in Å) for Cu-N1, Cu-N2, Cu-P1 and Cu-P2. Right: angles N1-Cu-N2 ( $\theta_1$ ), P1-Cu-P2 ( $\theta_2$ ), dihedral angle between N-Cu-N and P-Cu-P planes ( $\theta_3$ ) and N1-C1-C2-N2 ( $\theta_4$ ). .....S5
4. **Figure S2.** Schematic representations of the **1** (left) and **2** (right) clusters. ....S5
5. **Figure S3.** Overlays of  $S_0$  structures in the gas phase (green), solution (THF, blue) and crystal (red) for **1** and **2**. Overlays of  $S_1$  and  $T_1$  structures in the gas phase, solution and crystal also show in Figure S2, respectively. ....S6
6. **Figure S4.** Overlays of optimized  $S_0$  structures (red) and X-Ray structures (silver) in crystal for compound **1** (left) and **2** (right). .....S6
7. **Figure S5.** TD-DFT computed absorption and emission spectra at the  $S_0$  and  $S_1$  minima in gas phase (green lines), solution (blue lines), and crystal (red lines) of compound **2**. Also shown are experimentally measured absorption (in solution, dotted lines) and emission spectra (in crystal phase, dotted lines). .....S7
8. **Figure S6.** (**1** left and **2** right) Absorption spectra (THF) are show in blue line and spectral envelope plotted with Gaussians of  $1500\text{ cm}^{-1}$  full width at half-maximum are show in maroon dash line. The data points of the experimental spectrum are show in black dotted line. ....S7
9. **Figure S7.** TD-DFT computed absorption in gas phase (green lines), dichloromethane (blue lines), and crystal (red lines) of compound **1** and **2**. Also shown are experimentally measured absorption (in dichloromethane, dotted lines). .....S7
10. **Figure S8.** Adiabatic energy differences and reorganization energy calculated based on optimized  $S_1$  and  $T_1$  minima in gas, solution and crystal for **2**. .....S8

|                                                                                                                                                                                                                                                        |     |
|--------------------------------------------------------------------------------------------------------------------------------------------------------------------------------------------------------------------------------------------------------|-----|
| 11. <b>Figure S9.</b> The temperature dependence of the interconversion and decay rates from 200 to 300 K for <b>2</b> .                                                                                                                               | S8  |
| 12. <b>Figure S10.</b> (R)ISC rate constant as a function of energy gap at different temperatures of <b>1</b> in gas, solution and crystal.                                                                                                            | S9  |
| 13. <b>Figure S11.</b> (R)ISC rate constant as a function of energy gap at different temperatures of <b>2</b> in gas, solution and crystal.                                                                                                            | S10 |
| 14. <b>Figure S12.</b> Huang-Rhys factors for energy conversion between $S_1$ and $T_1$ as well as displacement vectors of important vibration modes with the largest value of Huang-Rhys factor in gas, solution and crystal for <b>2</b> .           | S11 |
| 15. <b>Table S3.</b> Relative energies (eV) of B3LYP/6-31G* & LANL2DZ (Cu) optimized structures for <b>1</b> and <b>2</b> in the gas phase, solution, and crystal. (Ground state energy as reference point).                                           | S12 |
| 16. <b>Table S4.</b> Spin-orbit coupling matrix elements (SOCMEs) values, Marcus reorganization energy, intersystem crossing rates and reverse intersystem crossing rates (ISC from $S_1$ to $T_1$ and RISC from $T_1$ to $S_1$ ).                     | S13 |
| 17. <b>Table S5.</b> The temperature dependence of the intersystem crossing rates and reverse intersystem crossing rates ( $s^{-1}$ ) (ISC from $S_1$ to $T_1$ and RISC from $T_1$ to $S_1$ ).                                                         | S14 |
| 18. <b>Table S6.</b> Oscillator strength, radiative rate constant and lifetime.                                                                                                                                                                        | S15 |
| 19. <b>Table S7.</b> Vertical excitation energies, oscillator strengths, wavelength and singly occupied orbitals involved in the $S_0 \rightarrow S_n$ electronic transitions in the gas phase, solution, and crystal, which are computed by TD-B3LYP. | S16 |
| 20. <b>Table S8.</b> Vertical emission energies, oscillator strengths, wavelength and singly occupied orbitals involved in the $S_1 \rightarrow S_0$ and $T_1 \rightarrow S_0$ electronic transitions in the gas phase, solution, and crystal.         | S22 |
| 21. <b>Figure S13.</b> Molecular orbitals at the $S_0$ , $S_1$ and $T_1$ minima of compound <b>1</b> in gas phase.                                                                                                                                     | S23 |
| 22. <b>Figure S14.</b> Molecular orbitals at the $S_0$ , $S_1$ and $T_1$ minima of compound <b>1</b> in solution.                                                                                                                                      | S24 |
| 23. <b>Figure S15.</b> Molecular orbitals at the $S_0$ , $S_1$ and $T_1$ minima of compound <b>1</b> in crystal.                                                                                                                                       | S25 |
| 24. <b>Figure S16.</b> Molecular orbitals at the $S_0$ , $S_1$ and $T_1$ minima of compound <b>2</b> in gas phase.                                                                                                                                     | S26 |
| 25. <b>Figure S17.</b> Molecular orbitals at the $S_0$ , $S_1$ and $T_1$ minima of compound <b>2</b> in solution.                                                                                                                                      | S27 |
| 26. <b>Figure S18.</b> Molecular orbitals at the $S_0$ , $S_1$ and $T_1$ minima of compound <b>2</b> in crystal.                                                                                                                                       | S28 |
| 27. <b>Figure S19.</b> Natural transition orbital pairs at the $S_1$ and $T_1$ minima for Compound <b>1</b> and <b>2</b> .                                                                                                                             | S29 |
| 28. <b>Figure S20.</b> TD-DFT computed HOMO and LUMO at the $S_1$ minima of compound <b>1</b> in solution.                                                                                                                                             | S29 |
| 29. <b>Figure S21.</b> Overlays of $S_1$ (gray) and $T_1$ (green) structures in solution for complex <b>1</b> .                                                                                                                                        | S30 |

**Table S1.** Key Geometric Parameters of Complexes **1** and **2** in the Gas Phase, Solution, and Crystal (Length in Å and Angles in °).

| <b>Gas</b>             |                      |                      |                      |                      |
|------------------------|----------------------|----------------------|----------------------|----------------------|
| <b>Lengths</b>         | <b>Cu-N1</b>         | <b>Cu-N2</b>         | <b>Cu-P1</b>         | <b>Cu-P2</b>         |
| <b>1-S<sub>0</sub></b> | 2.243                | 2.072                | 2.360                | 2.392                |
| <b>1-S<sub>1</sub></b> | 2.027                | 1.975                | 2.531                | 2.478                |
| <b>1-T<sub>1</sub></b> | 2.007                | 1.979                | 2.511                | 2.472                |
| <b>2-S<sub>0</sub></b> | 2.243                | 2.075                | 2.365                | 2.387                |
| <b>2-S<sub>1</sub></b> | 2.028                | 1.974                | 2.530                | 2.478                |
| <b>2-T<sub>1</sub></b> | 2.008                | 1.978                | 2.509                | 2.475                |
| <b>Angles</b>          | <b>θ<sub>1</sub></b> | <b>θ<sub>2</sub></b> | <b>θ<sub>3</sub></b> | <b>θ<sub>4</sub></b> |
| <b>1-S<sub>0</sub></b> | 79.0                 | 115.6                | 85.8                 | -0.1                 |
| <b>1-S<sub>1</sub></b> | 83.4                 | 106.7                | 58.9                 | 11.1                 |
| <b>1-T<sub>1</sub></b> | 83.1                 | 107.8                | 61.2                 | 4.7                  |
| <b>2-S<sub>0</sub></b> | 78.9                 | 115.9                | 86.2                 | -0.0                 |
| <b>2-S<sub>1</sub></b> | 83.4                 | 106.5                | 58.4                 | 11.2                 |
| <b>2-T<sub>1</sub></b> | 83.1                 | 107.6                | 60.4                 | 4.5                  |
| <b>Solution</b>        |                      |                      |                      |                      |
| <b>Lengths</b>         | <b>Cu-N1</b>         | <b>Cu-N2</b>         | <b>Cu-P1</b>         | <b>Cu-P2</b>         |
| <b>1-S<sub>0</sub></b> | 2.227                | 2.102                | 2.367                | 2.394                |
| <b>1-S<sub>1</sub></b> | 2.030                | 2.007                | 2.513                | 2.479                |
| <b>1-T<sub>1</sub></b> | 2.009                | 2.009                | 2.500                | 2.470                |
| <b>2-S<sub>0</sub></b> | 2.228                | 2.102                | 2.366                | 2.395                |
| <b>2-S<sub>1</sub></b> | 2.029                | 2.010                | 2.522                | 2.483                |
| <b>2-T<sub>1</sub></b> | 2.009                | 2.010                | 2.504                | 2.475                |
| <b>Angles</b>          | <b>θ<sub>1</sub></b> | <b>θ<sub>2</sub></b> | <b>θ<sub>3</sub></b> | <b>θ<sub>4</sub></b> |
| <b>1-S<sub>0</sub></b> | 78.6                 | 115.6                | 86.5                 | -0.5                 |
| <b>1-S<sub>1</sub></b> | 82.8                 | 106.3                | 55.3                 | 10.6                 |
| <b>1-T<sub>1</sub></b> | 82.5                 | 107.5                | 57.6                 | 4.0                  |
| <b>2-S<sub>0</sub></b> | 78.6                 | 115.4                | 86.8                 | -0.5                 |
| <b>2-S<sub>1</sub></b> | 82.7                 | 105.9                | 55.0                 | 10.3                 |
| <b>2-T<sub>1</sub></b> | 82.6                 | 107.1                | 57.9                 | 4.2                  |
| <b>Crystal</b>         |                      |                      |                      |                      |
| <b>Lengths</b>         | <b>Cu-N1</b>         | <b>Cu-N2</b>         | <b>Cu-P1</b>         | <b>Cu-P2</b>         |
| <b>1-S<sub>0</sub></b> | 2.143                | 2.087                | 2.327                | 2.348                |
| <b>1-S<sub>1</sub></b> | 2.001                | 1.994                | 2.437                | 2.440                |
| <b>1-T<sub>1</sub></b> | 1.979                | 1.994                | 2.420                | 2.439                |

|                        |                      |                      |                      |                      |
|------------------------|----------------------|----------------------|----------------------|----------------------|
| <b>2-S<sub>0</sub></b> | 2.173                | 2.085                | 2.326                | 2.412                |
| <b>2-S<sub>1</sub></b> | 2.026                | 2.003                | 2.430                | 2.483                |
| <b>2-T<sub>1</sub></b> | 2.002                | 1.999                | 2.429                | 2.499                |
| <b>Angles</b>          | <b>θ<sub>1</sub></b> | <b>θ<sub>2</sub></b> | <b>θ<sub>3</sub></b> | <b>θ<sub>4</sub></b> |
| <b>1-S<sub>0</sub></b> | 79.6                 | 116.2                | 83.3                 | 1.3                  |
| <b>1-S<sub>1</sub></b> | 83.4                 | 108.8                | 68.1                 | 17.8                 |
| <b>1-T<sub>1</sub></b> | 83.1                 | 109.9                | 70.9                 | 12.7                 |
| <b>2-S<sub>0</sub></b> | 79.0                 | 116.7                | 87.8                 | 10.4                 |
| <b>2-S<sub>1</sub></b> | 83.4                 | 108.6                | 75.1                 | 21.1                 |
| <b>2-T<sub>1</sub></b> | 83.1                 | 109.7                | 76.9                 | 17.7                 |

Note: N1-Cu-N2 ( $\theta_1$ ), P1-Cu-P2 ( $\theta_2$ ), dihedral angle between N-Cu-N and P-Cu-P planes ( $\theta_3$ ) and N1-C1-C2-N2 ( $\theta_4$ ).

**Table S2.** Key Geometric Parameters of Ground State Structures Optimized by Different Basis Sets (with Same Functional B3LYP) for Complexes **1** in Crystal (Length in Å and Angles in °).

| <b>Crystal</b>                               |                      |                      |                      |                      |
|----------------------------------------------|----------------------|----------------------|----------------------|----------------------|
| <b>Lengths</b>                               | <b>Cu-N1</b>         | <b>Cu-N2</b>         | <b>Cu-P1</b>         | <b>Cu-P2</b>         |
| <b>6-31G* &amp; LANL2DZ(Cu)</b>              | 2.143                | 2.087                | 2.327                | 2.348                |
| <b>6-31G** &amp; LANL2TZ-f(Cu)</b>           | 2.123                | 2.069                | 2.302                | 2.320                |
| <b>6-31G* &amp; 6-31+G*(P) &amp; SDD(Cu)</b> | 2.126                | 2.072                | 2.280                | 2.300                |
| <b>Angles</b>                                | <b>θ<sub>1</sub></b> | <b>θ<sub>2</sub></b> | <b>θ<sub>3</sub></b> | <b>θ<sub>4</sub></b> |
| <b>6-31G* &amp; LANL2DZ(Cu)</b>              | 79.6                 | 116.2                | 83.3                 | 1.3                  |
| <b>6-31G** &amp; LANL2TZ-f(Cu)</b>           | 80.0                 | 116.4                | 80.0                 | 0.6                  |
| <b>6-31G* &amp; 6-31+G*(P) &amp; SDD(Cu)</b> | 79.8                 | 117.0                | 83.4                 | 0.5                  |

Note: N1-Cu-N2 ( $\theta_1$ ), P1-Cu-P2 ( $\theta_2$ ), dihedral angle between N-Cu-N and P-Cu-P planes ( $\theta_3$ ) and N1-C1-C2-N2 ( $\theta_4$ ).

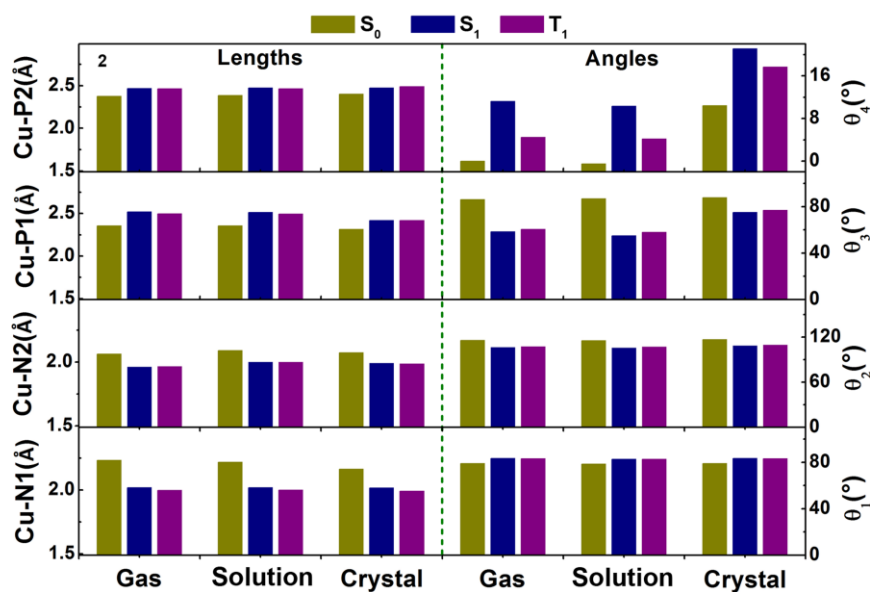

**Figure S1.** Key geometric parameters at the equilibrium geometries of the S<sub>0</sub>, S<sub>1</sub>, and T<sub>1</sub> states for **2** in the gas phase, solution and crystal. Left: bond lengths (in Å) for Cu-N1, Cu-N2, Cu-P1 and Cu-P2. Right: angles N1-Cu-N2 ( $\theta_1$ ), P1-Cu-P2 ( $\theta_2$ ), dihedral angle between N-Cu-N and P-Cu-P planes ( $\theta_3$ ) and N1-C1-C2-N2 ( $\theta_4$ ).

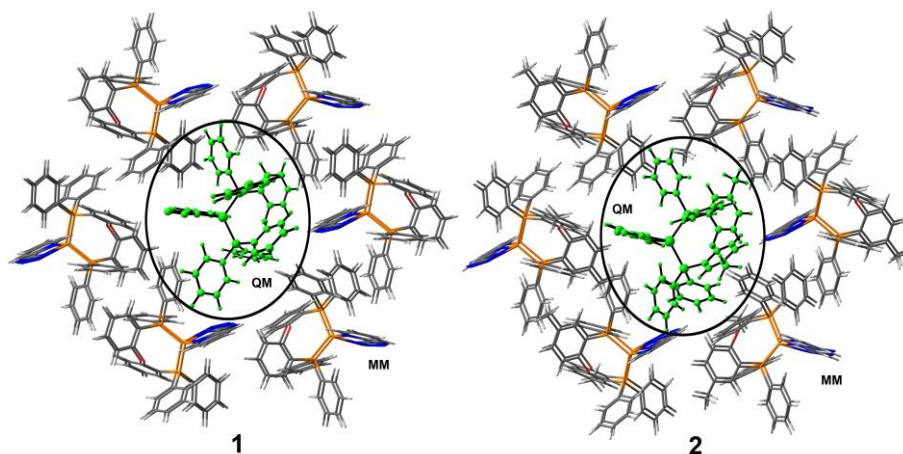

**Figure S2.** Schematic representations of clusters of compounds **1** (left) and **2** (right). The central monomer is treated at QM level and the outer monomers are treated at MM level.

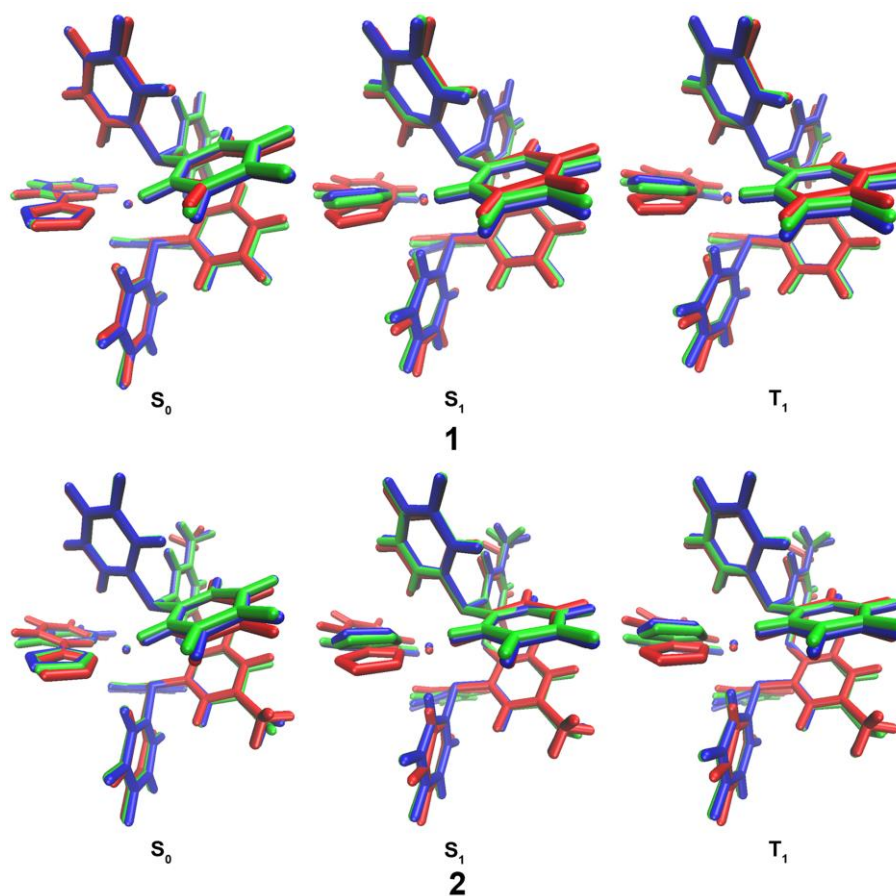

**Figure S3.** Overlays of  $S_0$ ,  $S_1$  and  $T_1$  structures in gas phase (green), solution (THF, blue) and crystal (red) for **1** and **2**, respectively.

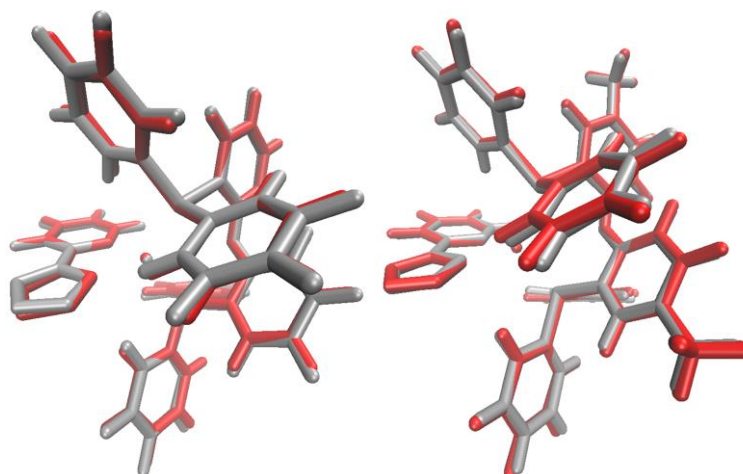

**Figure S4.** Overlays of optimized  $S_0$  structures (red) and X-Ray structures (silver) in crystal for compound **1** (left) and **2** (right).

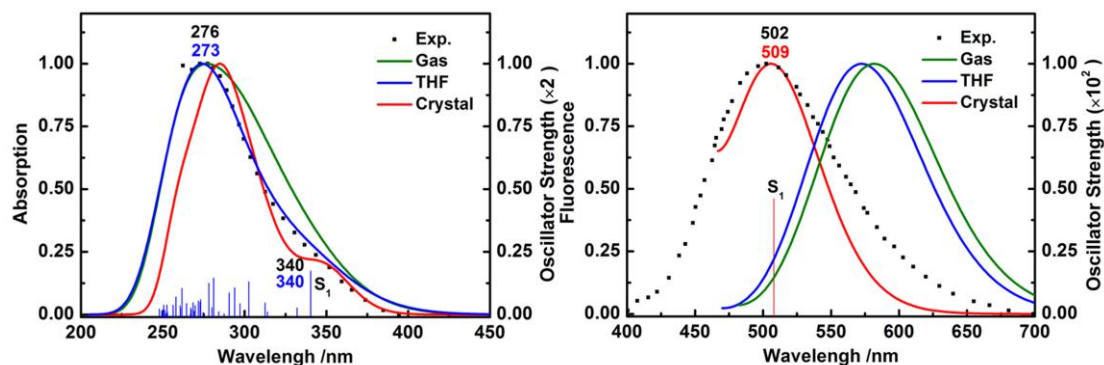

**Figure S5.** TD-DFT computed absorption and emission spectra at the  $S_0$  and  $S_1$  minima in gas phase (green lines), THF (blue lines), and crystal (red lines) of compound **2**. Also shown are experimentally measured absorption (in dichloromethane, dotted lines) and emission spectra (in the solid state, dotted lines).<sup>1</sup>

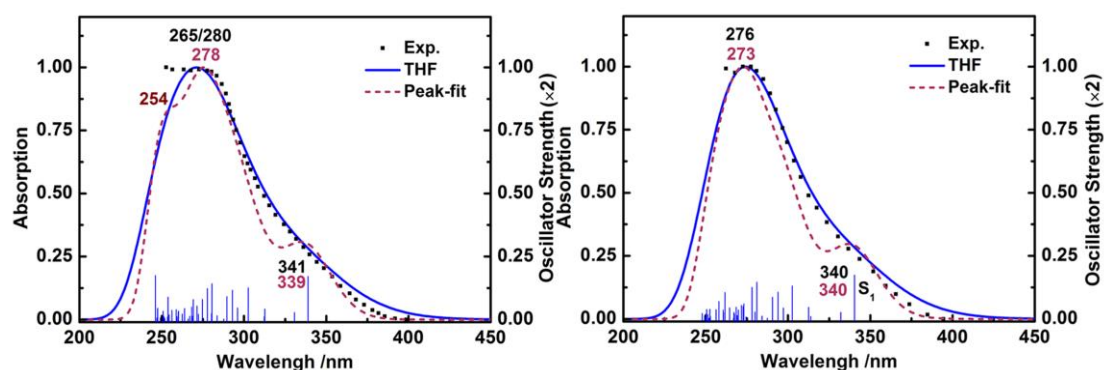

**Figure S6.** (1 left and 2 right) Absorption spectra (THF) are show in blue line and spectral envelope plotted with Gaussians of  $1500\text{ cm}^{-1}$  full width at half-maximum are show in maroon dash line. The data points of the experimental spectrum are show in black dotted line.

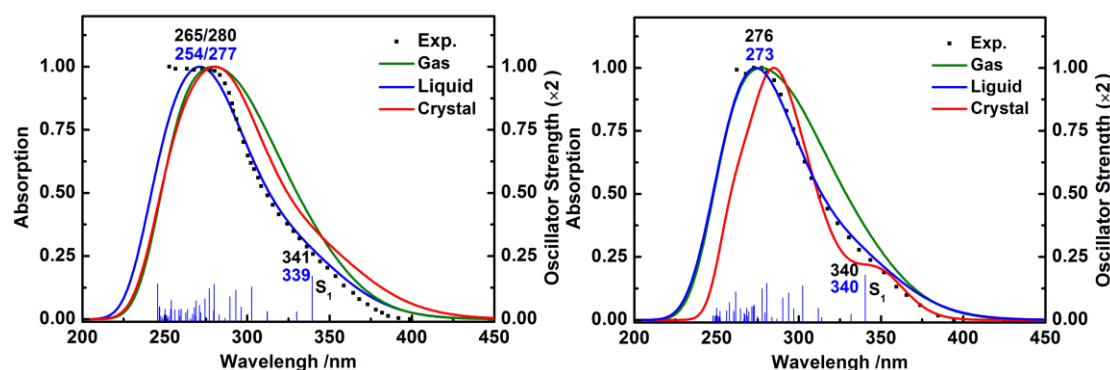

**Figure S7.** TD-DFT computed absorption in gas phase (green lines), dichloromethane (blue lines), and crystal (red lines) of compound **1** and **2**. Also shown are experimentally measured absorption (in dichloromethane, dotted lines).<sup>1</sup>

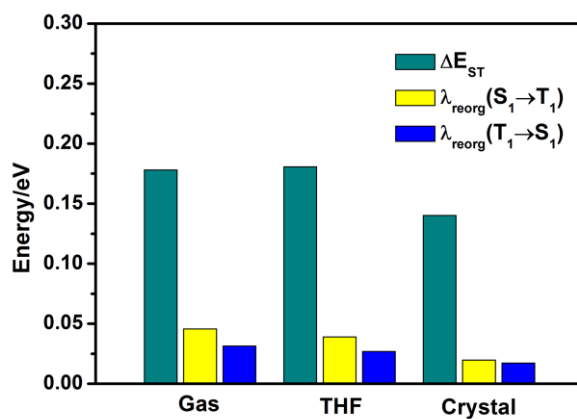

**Figure S8.** Adiabatic energy differences ( $\Delta E_{S_1-T_1}$ ) and reorganization energy calculated based on optimized  $S_1$  and  $T_1$  minima ( $\lambda_{reorg}$ ) in gas, solution and crystal for **2**.

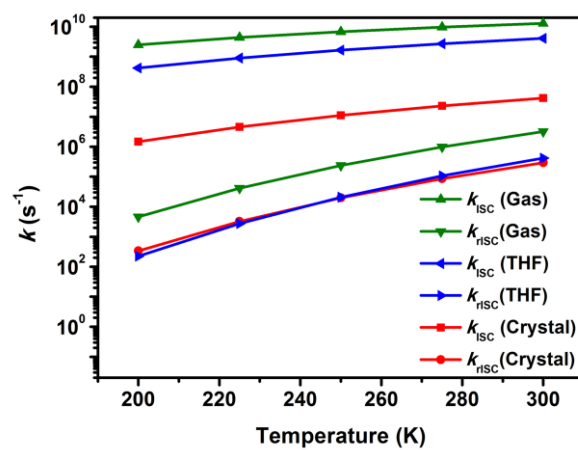

**Figure S9.** The temperature dependence of the interconversion and decay rates from 200 to 300 K for **2**.



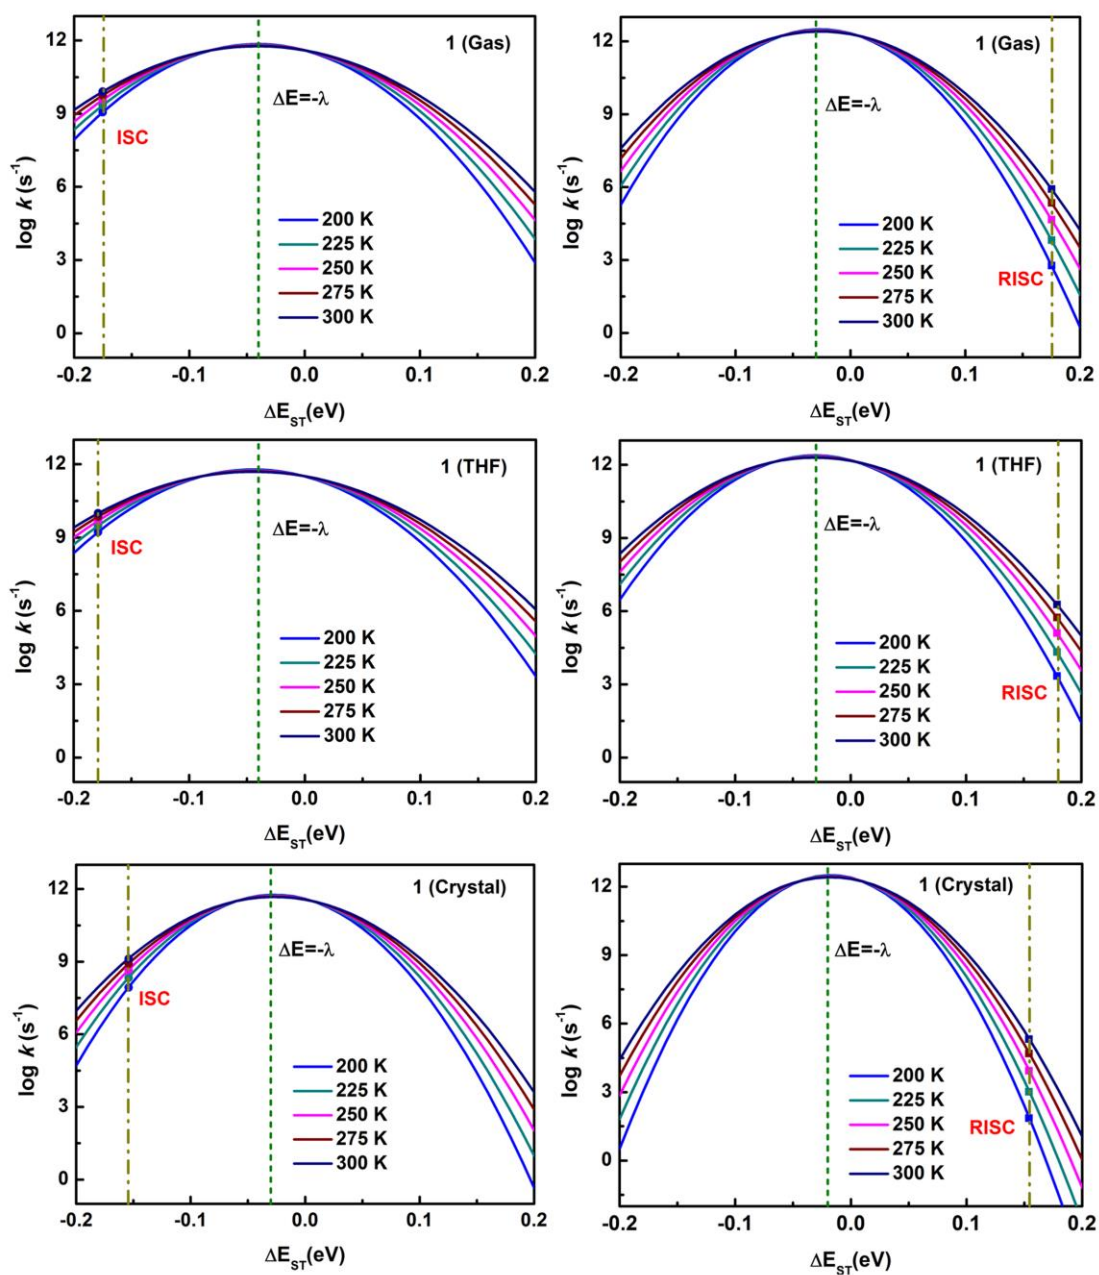

**Figure S10.** (R)ISC rate constant as a function of energy gap at different temperatures of **1** in gas, solution and crystal.

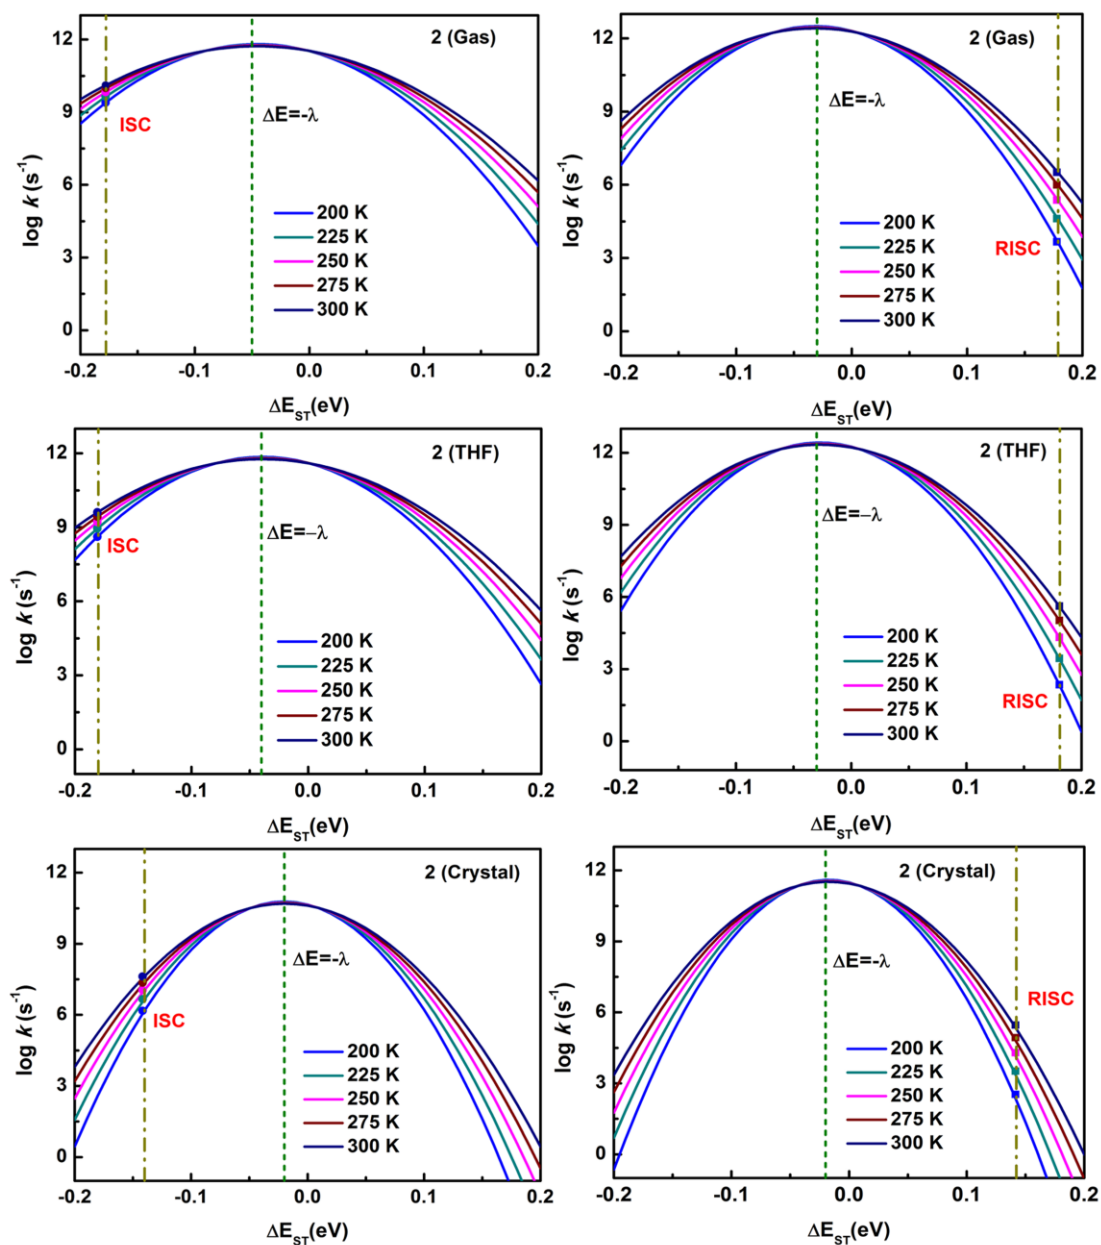

**Figure S11.** (R)ISC rate constant as a function of energy gap at different temperatures of **2** in gas, solution and crystal.

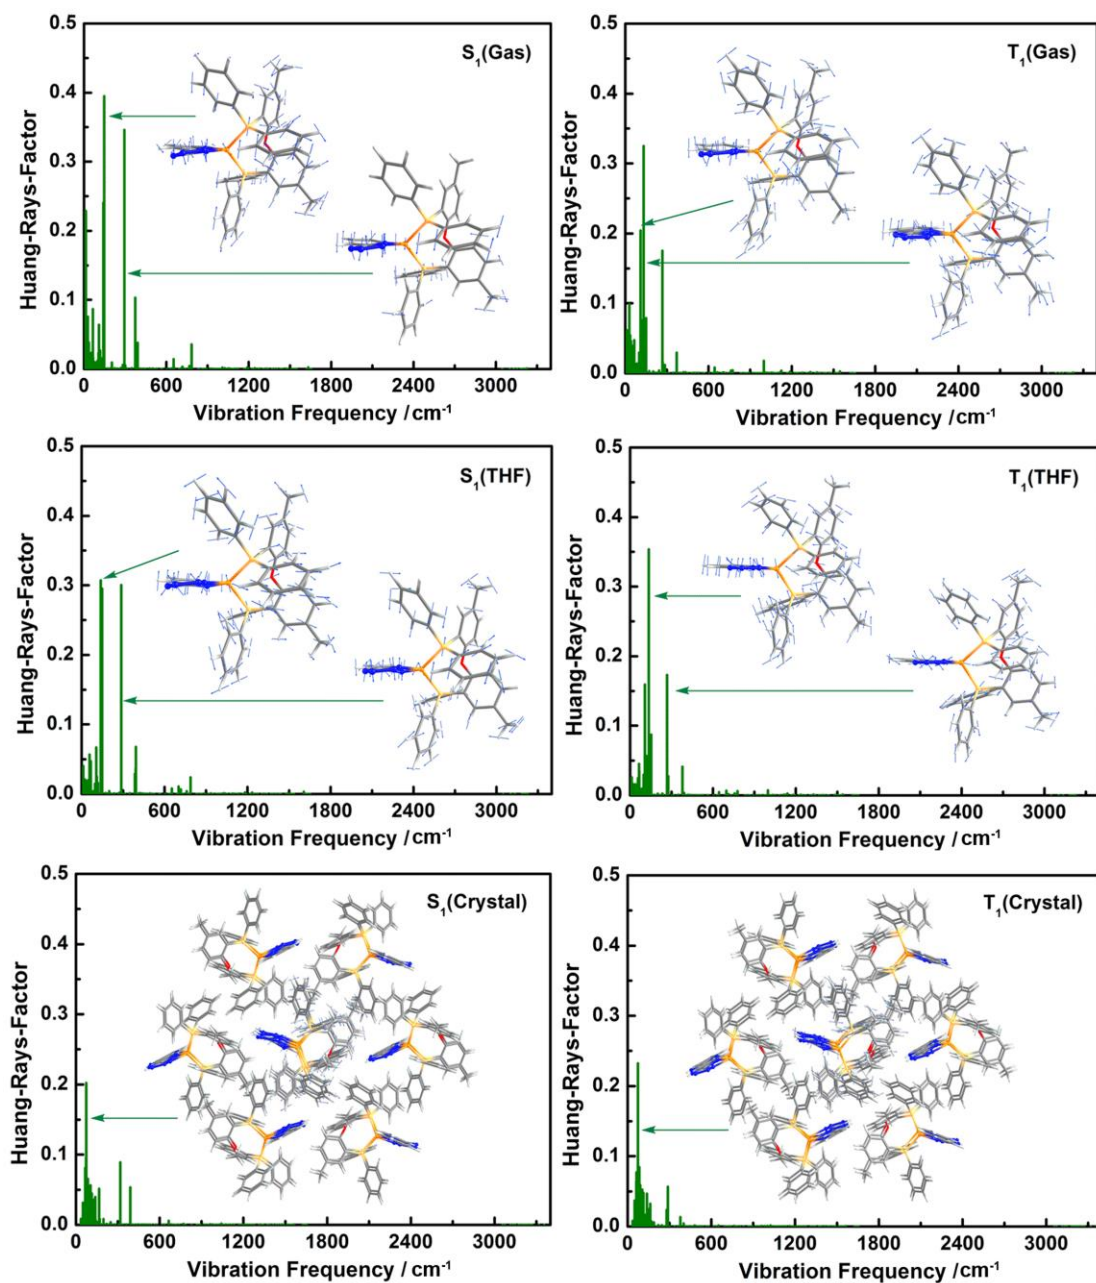

**Figure S12.** Huang-Rhys factors for energy conversion between  $S_1$  and  $T_1$  as well as displacement vectors of important vibration modes with the largest value of Huang-Rhys factor in gas, solution and crystal for **2**.

**Table S3.** Relative Energies (eV) of B3LYP/6-31G\*&LANL2DZ (Cu) Optimized Structures for **1** and **2** in the Gas Phase, Solution, and Crystal. (Ground State Energy as Reference Point).

|          |                      | <b>Gas</b> | <b>Solution</b> | <b>Crystal</b> |
|----------|----------------------|------------|-----------------|----------------|
| <b>1</b> | <b>S<sub>0</sub></b> | 0          | 0               | 0              |
|          | <b>S<sub>1</sub></b> | 2.91       | 2.95            | 2.92           |
|          | <b>T<sub>1</sub></b> | 2.73       | 2.77            | 2.77           |
|          | $\Delta E_{S_1-T_1}$ | 0.18       | 0.18            | 0.15           |
| <b>2</b> | <b>S<sub>0</sub></b> | 0          | 0               | 0              |
|          | <b>S<sub>1</sub></b> | 2.89       | 2.96            | 3.00           |
|          | <b>T<sub>1</sub></b> | 2.72       | 2.78            | 2.86           |
|          | $\Delta E_{S_1-T_1}$ | 0.18       | 0.18            | 0.14           |

|                 |          |                      | <b>At S<sub>0</sub></b> | <b>At S<sub>1</sub></b> | <b>At T<sub>1</sub></b> |
|-----------------|----------|----------------------|-------------------------|-------------------------|-------------------------|
| <b>Gas</b>      | <b>1</b> | <b>S<sub>1</sub></b> | 3.63                    | 2.91                    | 2.94                    |
|                 |          | <b>T<sub>1</sub></b> | 3.23                    | 2.75                    | 2.73                    |
|                 |          | <b>T<sub>2</sub></b> | 3.45                    | 3.63                    | 3.60                    |
|                 | <b>2</b> | <b>S<sub>1</sub></b> | 3.62                    | 2.89                    | 2.93                    |
|                 |          | <b>T<sub>1</sub></b> | 3.23                    | 2.74                    | 2.71                    |
|                 |          | <b>T<sub>2</sub></b> | 3.43                    | 3.63                    | 3.60                    |
| <b>Solution</b> | <b>1</b> | <b>S<sub>1</sub></b> | 3.66                    | 2.95                    | 3.00                    |
|                 |          | <b>T<sub>1</sub></b> | 3.36                    | 2.80                    | 2.77                    |
|                 |          | <b>T<sub>2</sub></b> | 3.44                    | 3.72                    | 3.67                    |
|                 | <b>2</b> | <b>S<sub>1</sub></b> | 3.64                    | 2.96                    | 3.01                    |
|                 |          | <b>T<sub>1</sub></b> | 3.36                    | 2.81                    | 3.01                    |
|                 |          | <b>T<sub>2</sub></b> | 3.44                    | 3.76                    | 3.69                    |
| <b>Crystal</b>  | <b>1</b> | <b>S<sub>1</sub></b> | 3.49                    | 2.90                    | 2.92                    |
|                 |          | <b>T<sub>1</sub></b> | 3.25                    | 2.75                    | 2.73                    |
|                 |          | <b>T<sub>2</sub></b> | 3.30                    | 3.52                    | 3.43                    |
|                 | <b>2</b> | <b>S<sub>1</sub></b> | 3.61                    | 2.99                    | 2.99                    |
|                 |          | <b>T<sub>1</sub></b> | 3.30                    | 2.86                    | 2.84                    |
|                 |          | <b>T<sub>2</sub></b> | 3.35                    | 3.36                    | 3.30                    |

**Table S4.** Spin-Orbit Coupling Matrix Elements (SOCMEs) Values (cm<sup>-1</sup>), Marcus Reorganization Energy ( $\lambda_{\text{reorg}}$  eV) Intersystem Crossing Rates and Reverse Intersystem Crossing Rates (s<sup>-1</sup>) (ISC from S<sub>1</sub> to T<sub>1</sub> and RISC from T<sub>1</sub> to S<sub>1</sub>).

|                 |          | SOCMEs                  | $k_{\text{isc}}/k_{\text{risc}}$ | $\lambda_{\text{reorg}}$ |
|-----------------|----------|-------------------------|----------------------------------|--------------------------|
| <b>Gas</b>      |          | <b>At S<sub>1</sub></b> |                                  |                          |
|                 | <b>1</b> | 21.48                   | 8.03×10 <sup>9</sup>             | 0.04                     |
|                 | <b>2</b> | 21.03                   | 1.30×10 <sup>10</sup>            | 0.05                     |
|                 |          | <b>At T<sub>1</sub></b> |                                  |                          |
|                 | <b>1</b> | 40.18                   | 8.36×10 <sup>5</sup>             | 0.03                     |
|                 | <b>2</b> | 40.13                   | 3.22×10 <sup>6</sup>             | 0.03                     |
| <b>Solution</b> |          | <b>At S<sub>1</sub></b> |                                  |                          |
|                 | <b>1</b> | 20.25                   | 9.86×10 <sup>9</sup>             | 0.04                     |
|                 | <b>2</b> | 21.29                   | 4.10×10 <sup>9</sup>             | 0.04                     |
|                 |          | <b>At T<sub>1</sub></b> |                                  |                          |
|                 | <b>1</b> | 36.81                   | 1.87×10 <sup>6</sup>             | 0.03                     |
|                 | <b>2</b> | 37.28                   | 4.17×10 <sup>5</sup>             | 0.03                     |
| <b>Crystal</b>  |          | <b>At S<sub>1</sub></b> |                                  |                          |
|                 | <b>1</b> | 17.39                   | 1.32×10 <sup>9</sup>             | 0.03                     |
|                 | <b>2</b> | 5.22                    | 4.18×10 <sup>7</sup>             | 0.02                     |
|                 |          | <b>At T<sub>1</sub></b> |                                  |                          |
|                 | <b>1</b> | 36.65                   | 2.08×10 <sup>5</sup>             | 0.02                     |
|                 | <b>2</b> | 12.97                   | 2.93×10 <sup>5</sup>             | 0.02                     |

| Compound 2      | $\langle S_1   \hat{H}_{so}   T_I \rangle$ | $\langle S_1   \hat{H}_{so}   T_{II} \rangle$ | $\langle S_1   \hat{H}_{so}   T_{III} \rangle$ | $\Sigma(\text{SOMEs})^2$ | Rates(s <sup>-1</sup> ) |
|-----------------|--------------------------------------------|-----------------------------------------------|------------------------------------------------|--------------------------|-------------------------|
| <b>Gas</b>      |                                            |                                               |                                                |                          |                         |
| <b>ISC</b>      | 11.89                                      | 12.26                                         | 12.26                                          | 442                      | 1.30×10 <sup>10</sup>   |
| <b>rISC</b>     | 19.38                                      | 24.85                                         | 24.85                                          | 1611                     | 3.22×10 <sup>6</sup>    |
| <b>Solution</b> |                                            |                                               |                                                |                          |                         |
| <b>ISC</b>      | 12.68                                      | 12.10                                         | 12.10                                          | 453                      | 4.10×10 <sup>9</sup>    |
| <b>rISC</b>     | 19.85                                      | 22.32                                         | 22.32                                          | 1390                     | 4.17×10 <sup>5</sup>    |
| <b>Crystal</b>  |                                            |                                               |                                                |                          |                         |
| <b>ISC</b>      | 2.34                                       | 3.30                                          | 3.30                                           | 27                       | 4.18×10 <sup>7</sup>    |
| <b>rISC</b>     | 0.31                                       | 9.17                                          | 9.17                                           | 168                      | 2.93×10 <sup>5</sup>    |

**Table S5.** The Temperature Dependence of the Intersystem Crossing Rates and Reverse Intersystem Crossing Rates (s<sup>-1</sup>) (ISC from S<sub>1</sub> to T<sub>1</sub> and rISC form T<sub>1</sub> to S<sub>1</sub>).

|   | Temperature (K) | <i>k<sub>ISC</sub></i>  |                      |                      |
|---|-----------------|-------------------------|----------------------|----------------------|
|   |                 | Gas                     | Solution             | Crystal              |
| 1 | 200             | 1.15×10 <sup>9</sup>    | 1.69×10 <sup>9</sup> | 8.55×10 <sup>6</sup> |
|   | 225             | 2.21×10 <sup>9</sup>    | 3.07×10 <sup>9</sup> | 2.15×10 <sup>8</sup> |
|   | 250             | 3.72×10 <sup>9</sup>    | 4.92×10 <sup>9</sup> | 4.47×10 <sup>8</sup> |
|   | 275             | 5.67×10 <sup>9</sup>    | 7.20×10 <sup>9</sup> | 8.10×10 <sup>8</sup> |
|   | 300             | 8.03×10 <sup>9</sup>    | 9.86×10 <sup>9</sup> | 1.32×10 <sup>9</sup> |
| 2 | 200             | 2.50×10 <sup>9</sup>    | 4.18×10 <sup>8</sup> | 1.48×10 <sup>6</sup> |
|   | 225             | 4.37×10 <sup>9</sup>    | 9.03×10 <sup>8</sup> | 4.55×10 <sup>6</sup> |
|   | 250             | 6.81×10 <sup>9</sup>    | 1.66×10 <sup>9</sup> | 1.11×10 <sup>7</sup> |
|   | 275             | 9.73×10 <sup>9</sup>    | 2.72×10 <sup>9</sup> | 2.29×10 <sup>7</sup> |
|   | 300             | 1.30×10 <sup>10</sup>   | 4.10×10 <sup>9</sup> | 4.18×10 <sup>7</sup> |
|   | Temperature (K) | <i>k<sub>rISC</sub></i> |                      |                      |
|   |                 | Gas                     | Solution             | Crystal              |
| 1 | 200             | 5.85×10 <sup>2</sup>    | 2.22×10 <sup>3</sup> | 7.20×10 <sup>1</sup> |
|   | 225             | 6.64×10 <sup>3</sup>    | 2.11×10 <sup>4</sup> | 1.04×10 <sup>3</sup> |
|   | 250             | 4.62×10 <sup>4</sup>    | 1.28×10 <sup>5</sup> | 8.68×10 <sup>3</sup> |
|   | 275             | 2.25×10 <sup>5</sup>    | 5.53×10 <sup>5</sup> | 4.92×10 <sup>4</sup> |
|   | 300             | 8.36×10 <sup>5</sup>    | 1.87×10 <sup>6</sup> | 2.08×10 <sup>5</sup> |
| 2 | 200             | 4.62×10 <sup>3</sup>    | 2.24×10 <sup>2</sup> | 3.39×10 <sup>2</sup> |
|   | 225             | 4.13×10 <sup>4</sup>    | 2.78×10 <sup>3</sup> | 3.26×10 <sup>3</sup> |
|   | 250             | 2.37×10 <sup>5</sup>    | 2.07×10 <sup>4</sup> | 1.98×10 <sup>4</sup> |
|   | 275             | 9.84×10 <sup>5</sup>    | 1.07×10 <sup>5</sup> | 8.63×10 <sup>4</sup> |
|   | 300             | 3.22×10 <sup>6</sup>    | 4.17×10 <sup>5</sup> | 2.93×10 <sup>5</sup> |

**Table S6.** Oscillator Strength [ $T_1$  ( $f_{S_0-T_1}$ ) and  $S_1$  ( $f_{S_0-S_1}$ )], Emission Rate Constant ( $k_r^{P/F}/s^{-1}$ ) and lifetime ( $\tau^{P/F}/\mu s$ ).

|          |                    | <b>Gas</b>            | <b>Solution</b>       | <b>Crystal</b>        |
|----------|--------------------|-----------------------|-----------------------|-----------------------|
| <b>1</b> | $f_{S_0-T_1,av}^a$ | $1.90 \times 10^{-5}$ | $1.35 \times 10^{-5}$ | $2.15 \times 10^{-5}$ |
|          | $k_{r,av}^P$       | $3.45 \times 10^3$    | $2.50 \times 10^3$    | $4.51 \times 10^3$    |
|          | $\tau_{r,av}^P$    | 290                   | 401                   | 222                   |
|          | $f_{S_0-S_1}$      | $7.20 \times 10^{-3}$ | $1.63 \times 10^{-2}$ | $7.00 \times 10^{-3}$ |
|          | $k_r^F$            | $1.43 \times 10^6$    | $3.32 \times 10^6$    | $1.58 \times 10^6$    |
|          | $\tau_r^F$         | 0.70                  | 0.30                  | 0.63                  |
| <b>2</b> | $f_{S_0-T_1,av}^a$ | $7.99 \times 10^{-6}$ | $1.32 \times 10^{-5}$ | $2.69 \times 10^{-5}$ |
|          | $k_{r,av}^P$       | $1.44 \times 10^3$    | $2.45 \times 10^3$    | $6.31 \times 10^3$    |
|          | $\tau_{r,av}^P$    | 694                   | 409                   | 158                   |
|          | $f_{S_0-S_1}$      | $7.20 \times 10^{-3}$ | $1.70 \times 10^{-2}$ | $4.30 \times 10^{-3}$ |
|          | $k_r^F$            | $1.41 \times 10^6$    | $3.43 \times 10^6$    | $1.11 \times 10^6$    |
|          | $\tau_r^F$         | 0.71                  | 0.29                  | 0.90                  |

<sup>a</sup>: The oscillator strength evaluated using the second-order perturbation theory based on relativistic scalar ZORA results obtained using the ADF program.

<sup>b</sup>:  $k_r$  is evaluated by  $k_r^{F/P} = \frac{2\pi\nu^2 e^2}{\epsilon_0 m c^3} f_{S_1, or T_1 \rightarrow S_0}$

**Table S7.** Vertical Excitation Energies ( $E_{\perp}$ , eV), Oscillator Strengths ( $f$ ), Wavelength (nm) and Singly Occupied Orbitals Involved in the  $S_0 \rightarrow S_n$  Electronic Transitions in the Gas Phase, Solution, and Crystal, Which are Computed by TD-B3LYP.

| Gas |          |                  |                |                                    |               |
|-----|----------|------------------|----------------|------------------------------------|---------------|
|     |          | $E_{\perp}$ (eV) | $\lambda$ (nm) | Assignments                        |               |
| 1   | $S_1$    | 3.63 (0.0179)    | 342            | HOMO-1 $\rightarrow$ LUMO (57.2)   | MLCT<br>+ILCT |
|     |          |                  |                | HOMO $\rightarrow$ LUMO (38.4)     | MLCT<br>+ILCT |
|     | $S_2$    | 3.73 (0.0625)    | 332            | HOMO-1 $\rightarrow$ LUMO (37.3)   | MLCT<br>+ILCT |
|     |          |                  |                | HOMO $\rightarrow$ LUMO (59.1)     | MLCT<br>+ILCT |
|     | $S_3$    | 3.80 (0.0163)    | 326            | HOMO $\rightarrow$ LUMO+1 (97.2)   | MLCT<br>+ILCT |
|     | $S_4$    | 3.99 (0.0142)    | 311            | HOMO $\rightarrow$ LUMO+2 (84.9)   | MLCT<br>+ILCT |
|     | $S_5$    | 4.03 (0.0054)    | 308            | HOMO-1 $\rightarrow$ LUMO+1 (71.3) | MLCT<br>+ILCT |
|     | $S_6$    | 4.04 (0.0126)    | 307            | HOMO-3 $\rightarrow$ LUMO (65.0)   | MLCT<br>+ILCT |
|     | $S_7$    | 4.12 (0.0311)    | 301            | HOMO $\rightarrow$ LUMO+3 (82.1)   | MLCT<br>+ILCT |
|     | ...      |                  |                |                                    |               |
|     | $S_{18}$ | 4.39 (0.0005)    | 282            | HOMO-2 $\rightarrow$ LUMO+1 (84.3) | ILCT          |
|     | $S_{19}$ | 4.51 (0.0244)    | 275            | HOMO $\rightarrow$ LUMO+7 (45.0)   | MLCT<br>+ILCT |
|     | $S_{20}$ | 4.51 (0.0346)    | 275            | HOMO $\rightarrow$ LUMO+8 (64.9)   | MLCT<br>+ILCT |
|     | $S_{21}$ | 4.53 (0.0080)    | 273            | HOMO-3 $\rightarrow$ LUMO+2 (38.0) | MLCT<br>+ILCT |
|     |          |                  |                | HOMO $\rightarrow$ LUMO+7 (37.4)   | MLCT<br>+ILCT |
|     | $S_{22}$ | 4.58 (0.0009)    | 271            | HOMO-6 $\rightarrow$ LUMO (88.6)   | $n\pi^*$      |
|     | $S_{23}$ | 4.58 (0.0059)    | 270            | HOMO-1 $\rightarrow$ LUMO+6 (59.8) | MLCT<br>+ILCT |
|     | $S_{24}$ | 4.59 (0.0125)    | 270            | HOMO-2 $\rightarrow$ LUMO+2 (71.3) | ILCT          |
|     | $S_{25}$ | 4.60 (0.0006)    | 269            | HOMO-3 $\rightarrow$ LUMO+3 (54.5) | MLCT<br>+ILCT |



|                       |                       |          |                           |                        |                        |                    |  |
|-----------------------|-----------------------|----------|---------------------------|------------------------|------------------------|--------------------|--|
| 2                     | <b>S<sub>26</sub></b> | 4.63     | (0.0210)                  | 268                    | HOMO-2 → LUMO+3 (53.1) | ILCT               |  |
|                       | <b>S<sub>27</sub></b> | 4.67     | (0.0067)                  | 266                    | HOMO-3 → LUMO+4 (28.2) | MLCT<br>+ILCT      |  |
|                       |                       |          |                           |                        | HOMO → LUMO+9 (35.1)   | MLCT<br>+ILCT      |  |
|                       | <b>S<sub>28</sub></b> | 4.68     | (0.0288)                  | 265                    | HOMO-3 → LUMO+5 (14.7) | MLCT<br>+ILCT      |  |
|                       |                       |          |                           |                        | HOMO-2 → LUMO+3 (14.7) | ILCT               |  |
|                       |                       |          |                           |                        | HOMO-2 → LUMO+4 (15.2) |                    |  |
|                       |                       |          |                           |                        | HOMO-1 → LUMO+9 (21.9) | MLCT<br>+ILCT      |  |
|                       | <b>S<sub>29</sub></b> | 4.70     | (0.0097)                  | 264                    | HOMO-2 → LUMO+3 (14.5) | ILCT               |  |
|                       |                       |          |                           |                        | HOMO-2 → LUMO+4 (13.2) |                    |  |
|                       |                       |          |                           |                        | HOMO → LUMO+9 (11.5)   | MLCT<br>+ILCT      |  |
|                       | <b>S<sub>30</sub></b> | 4.71     | (0.0001)                  | 263                    | HOMO-1 → LUMO+7 (42.3) | MLCT<br>+ILCT      |  |
|                       |                       |          | <b>E<sub>⊥</sub> (eV)</b> |                        | <b>λ (nm)</b>          | <b>Assignments</b> |  |
|                       | <b>S<sub>1</sub></b>  | 3.62     | (0.0138)                  | 343                    | HOMO-1 → LUMO (66.2)   | MLCT<br>+ILCT      |  |
| HOMO → LUMO (29.2)    |                       |          |                           |                        | MLCT<br>+ILCT          |                    |  |
| <b>S<sub>2</sub></b>  | 3.71                  | (0.0669) | 334                       | HOMO-1 → LUMO (28.1)   | MLCT<br>+ILCT          |                    |  |
|                       |                       |          |                           | HOMO → LUMO (68.3)     | MLCT<br>+ILCT          |                    |  |
| <b>S<sub>3</sub></b>  | 3.79                  | (0.0166) | 327                       | HOMO → LUMO+1 (68.3)   | MLCT<br>+ILCT          |                    |  |
| <b>S<sub>4</sub></b>  | 4.00                  | (0.0014) | 310                       | HOMO-3 → LUMO (53.6)   | MLCT<br>+ILCT          |                    |  |
| <b>S<sub>5</sub></b>  | 4.01                  | (0.005)  | 309                       | HOMO-1 → LUMO+1 (65.9) | MLCT<br>+ILCT          |                    |  |
| <b>S<sub>6</sub></b>  | 4.03                  | (0.0323) | 308                       | HOMO → LUMO+2 (62.9)   | MLCT<br>+ILCT          |                    |  |
| <b>S<sub>7</sub></b>  | 4.12                  | (0.0273) | 301                       | HOMO → LUMO+3 (80.2)   | MLCT<br>+ILCT          |                    |  |
| ...                   |                       |          |                           |                        |                        |                    |  |
| <b>S<sub>19</sub></b> | 4.50                  | (0.0244) | 276                       | HOMO → LUMO+7 (46.6)   | MLCT<br>+ILCT          |                    |  |
| <b>S<sub>20</sub></b> | 4.51                  | (0.022)  | 275                       | HOMO → LUMO+8 (70.6)   | MLCT<br>+ILCT          |                    |  |
| <b>S<sub>21</sub></b> | 4.54                  | (0.0091) | 273                       | HOMO-3 → LUMO+2 (49.8) | MLCT                   |                    |  |

|                       |                       |                           |          |                        |                        |               |
|-----------------------|-----------------------|---------------------------|----------|------------------------|------------------------|---------------|
|                       |                       |                           |          |                        |                        | +ILCT         |
|                       | <b>S<sub>22</sub></b> | 4.57                      | (0.0043) | 271                    | HOMO-6 → LUMO (61.8)   | nπ*           |
|                       | <b>S<sub>23</sub></b> | 4.57                      | (0.0056) | 271                    | HOMO-5 → LUMO+1 (46.6) | ILCT          |
|                       | <b>S<sub>24</sub></b> | 4.59                      | (0.0045) | 270                    | HOMO-3 → LUMO+3 (53.3) | MLCT<br>+ILCT |
|                       | <b>S<sub>25</sub></b> | 4.61                      | (0.0234) | 269                    | HOMO-2 → LUMO+2 (51.3) | ILCT          |
|                       | <b>S<sub>26</sub></b> | 4.63                      | (0.0101) | 268                    | HOMO-2 → LUMO+6 (52.4) | ILCT          |
|                       | <b>S<sub>27</sub></b> | 4.64                      | (0.0074) | 267                    | HOMO-2 → LUMO+3 (30.3) | ILCT          |
|                       | <b>S<sub>28</sub></b> | 4.66                      | (0.013)  | 266                    | HOMO-3 → LUMO+4 (29.9) | MLCT<br>+ILCT |
| <b>Solution</b>       |                       |                           |          |                        |                        |               |
|                       |                       | <b>E<sub>⊥</sub> (eV)</b> |          | <b>λ (nm)</b>          | <b>Assignments</b>     |               |
| <b>1</b>              | <b>S<sub>1</sub></b>  | 3.66                      | (0.0852) | 339                    | HOMO-1 → LUMO (7.6)    | MLCT<br>+ILCT |
|                       |                       |                           |          |                        | HOMO → LUMO (88.8)     | MLCT<br>+ILCT |
|                       | <b>S<sub>2</sub></b>  | 3.75                      | (0.0140) | 331                    | HOMO-2 → LUMO (14.0)   | MLCT<br>+ILCT |
|                       |                       |                           |          |                        | HOMO-1 → LUMO (75.3)   |               |
|                       | <b>S<sub>3</sub></b>  | 3.96                      | (0.0206) | 313                    | HOMO → LUMO+1 (94.6)   | MLCT<br>+ILCT |
|                       | <b>S<sub>4</sub></b>  | 3.97                      | (0.0057) | 312                    | HOMO-2 → LUMO (77.4)   | MLCT<br>+ILCT |
|                       | <b>S<sub>5</sub></b>  | 4.10                      | (0.0629) | 303                    | HOMO → LUMO+2 (94.3)   | MLCT<br>+ILCT |
|                       | ...                   |                           |          |                        |                        |               |
|                       | <b>S<sub>11</sub></b> | 4.42                      | (0.0709) | 281                    | HOMO-3 → LUMO (54.2)   | ππ*+ILCT      |
|                       | <b>S<sub>12</sub></b> | 4.42                      | (0.0120) | 280                    | HOMO-1 → LUMO+2 (21.9) | MLCT<br>ILCT  |
|                       |                       |                           |          |                        | HOMO-1 → LUMO+3 (26.9) | MLCT<br>+ILCT |
|                       | <b>S<sub>13</sub></b> | 4.46                      | (0.0613) | 278                    | HOMO-2 → LUMO+1 (84.4) | MLCT<br>+ILCT |
|                       | <b>S<sub>14</sub></b> | 4.51                      | (0.0400) | 275                    | HOMO → LUMO+6 (84.5)   | MLCT<br>+ILCT |
|                       | <b>S<sub>15</sub></b> | 4.55                      | (0.0106) | 272                    | HOMO-1 → LUMO+3 (34.0) | MLCT<br>+ILCT |
|                       |                       |                           |          |                        | HOMO-1 → LUMO+4 (41.3) |               |
|                       | <b>S<sub>16</sub></b> | 4.57                      | (0.0268) | 271                    | HOMO-2 → LUMO+2 (46.2) | MLCT<br>+ILCT |
|                       |                       |                           |          |                        | HOMO-1 → LUMO+4 (25.9) |               |
|                       | <b>S<sub>17</sub></b> | 4.61                      | (0.0395) | 269                    | HOMO → LUMO+7 (41.8)   | MLCT<br>+ILCT |
| HOMO → LUMO+8 (45.3)  |                       |                           |          |                        |                        |               |
| <b>S<sub>18</sub></b> | 4.62                  | (0.0065)                  | 269      | HOMO-1 → LUMO+5 (62.0) | MLCT<br>+ILCT          |               |

|                       |                       |                           |          |                        |                        |               |
|-----------------------|-----------------------|---------------------------|----------|------------------------|------------------------|---------------|
|                       | <b>S<sub>19</sub></b> | 4.62                      | (0.0250) | 268                    | HOMO-2 → LUMO+3 (52.1) | MLCT<br>+ILCT |
|                       | <b>S<sub>20</sub></b> | 4.64                      | (0.0066) | 267                    | HOMO → LUMO+7 (30.0)   | MLCT<br>+ILCT |
|                       | <b>S<sub>21</sub></b> | 4.66                      | (0.0008) | 266                    | HOMO-7 → LUMO (57.7)   | MLCT<br>+ILCT |
|                       | <b>S<sub>22</sub></b> | 4.70                      | (0.0218) | 264                    | HOMO-2 → LUMO+4 (67.6) | MLCT<br>+ILCT |
|                       | ...                   |                           |          |                        |                        |               |
|                       | <b>S<sub>30</sub></b> | 4.89                      | (0.0443) | 254                    | HOMO-4 → LUMO+2 (54.4) | ILCT<br>+ππ*  |
|                       |                       | <b>E<sub>⊥</sub> (eV)</b> |          | <b>λ (nm)</b>          | <b>Assignments</b>     |               |
| <b>2</b>              | <b>S<sub>1</sub></b>  | 3.64                      | (0.0867) | 340                    | HOMO-1 → LUMO (6.9)    | MLCT<br>+ILCT |
|                       |                       |                           |          |                        | HOMO → LUMO (89.9)     | MLCT<br>+ILCT |
|                       | <b>S<sub>2</sub></b>  | 3.73                      | (0.0130) | 332                    | HOMO-1 → LUMO (74.9)   | MLCT<br>+ILCT |
|                       | <b>S<sub>3</sub></b>  | 3.95                      | (0.0049) | 314                    | HOMO-2 → LUMO (73.6)   | MLCT<br>+ILCT |
|                       | <b>S<sub>4</sub></b>  | 3.97                      | (0.0230) | 313                    | HOMO → LUMO+1 (96.7)   | MLCT<br>+ILCT |
|                       | <b>S<sub>5</sub></b>  | 4.10                      | (0.0654) | 303                    | HOMO → LUMO+2 (94.4)   | MLCT<br>+ILCT |
|                       | ...                   |                           |          |                        |                        |               |
|                       | <b>S<sub>11</sub></b> | 4.41                      | (0.0729) | 281                    | HOMO-4 → LUMO (54.7)   | ππ*+ILCT      |
|                       | <b>S<sub>12</sub></b> | 4.43                      | (0.0136) | 280                    | HOMO-1 → LUMO+2 (33.1) | MLCT<br>+ILCT |
|                       |                       |                           |          |                        | HOMO-1 → LUMO+3 (33.4) |               |
|                       | <b>S<sub>13</sub></b> | 4.46                      | (0.0624) | 278                    | HOMO-2 → LUMO+1 (84.2) | MLCT<br>+ILCT |
|                       | <b>S<sub>14</sub></b> | 4.52                      | (0.0038) | 275                    | HOMO-3 → LUMO (70.2)   | ILCT          |
|                       | <b>S<sub>15</sub></b> | 4.54                      | (0.0297) | 273                    | HOMO-2 → LUMO+2 (31.2) | MLCT<br>+ILCT |
|                       | <b>S<sub>16</sub></b> | 4.55                      | (0.0243) | 273                    | HOMO-1 → LUMO+4 (44.2) | MLCT<br>+ILCT |
| HOMO → LUMO+6 (29.0)  |                       |                           |          |                        | MLCT<br>+ILCT          |               |
| <b>S<sub>17</sub></b> | 4.56                  | (0.0269)                  | 272      | HOMO-1 → LUMO+4 (25.1) | MLCT<br>+ILCT          |               |
|                       |                       |                           |          | HOMO → LUMO+6 (35.9)   | MLCT<br>+ILCT          |               |
| <b>S<sub>18</sub></b> | 4.60                  | (0.0174)                  | 270      | HOMO → LUMO+7 (41.4)   | MLCT                   |               |

|                       |                       |                           |                      |                        |               |
|-----------------------|-----------------------|---------------------------|----------------------|------------------------|---------------|
|                       |                       |                           |                      |                        | +ILCT         |
|                       | <b>S<sub>19</sub></b> | 4.61 (0.0065)             | 269                  | HOMO-1 → LUMO+5 (64.6) | MLCT<br>+ILCT |
|                       | <b>S<sub>20</sub></b> | 4.62 (0.0232)             | 269                  | HOMO → LUMO+8 (40.0)   | MLCT<br>+ILCT |
|                       | <b>S<sub>21</sub></b> | 4.63 (0.0094)             | 268                  | HOMO-3 → LUMO+1 (51.4) | ILCT          |
|                       | <b>S<sub>22</sub></b> | 4.64 (0.0129)             | 267                  | HOMO → LUMO+8 (30.3)   | MLCT<br>+ILCT |
| <b>Crystal</b>        |                       |                           |                      |                        |               |
|                       |                       | <b>E<sub>⊥</sub> (eV)</b> | <b>λ (nm)</b>        | <b>Assignments</b>     |               |
| <b>1</b>              | <b>S<sub>1</sub></b>  | 3.49 (0.0460)             | 355                  | HOMO-1 → LUMO (11.4)   | MLCT<br>+ILCT |
|                       |                       |                           |                      | HOMO → LUMO (78.6)     | MLCT<br>+ILCT |
|                       | <b>S<sub>2</sub></b>  | 3.69 (0.0282)             | 336                  | HOMO-1 → LUMO (68.1)   | MLCT<br>+ILCT |
|                       | <b>S<sub>3</sub></b>  | 3.83 (0.0159)             | 324                  | HOMO → LUMO+1 (78.1)   | MLCT<br>+ILCT |
|                       | <b>S<sub>4</sub></b>  | 3.84 (0.0111)             | 322                  | HOMO-2 → LUMO (59.3)   | MLCT<br>+ILCT |
|                       | <b>S<sub>5</sub></b>  | 4.02 (0.0041)             | 308                  | HOMO → LUMO+3 (59.8)   | MLCT<br>+ILCT |
|                       | ...                   |                           |                      |                        |               |
|                       | <b>S<sub>13</sub></b> | 4.40 (0.0118)             | 282                  | HOMO-1 → LUMO+2 (58.0) | MLCT<br>+ILCT |
|                       | <b>S<sub>14</sub></b> | 4.42 (0.0015)             | 280                  | HOMO-5 → LUMO (63.9)   | nπ*           |
|                       | <b>S<sub>15</sub></b> | 4.43 (0.0063)             | 280                  | HOMO-5 → LUMO (25.5)   | nπ*           |
|                       |                       |                           |                      | HOMO-2 → LUMO+3 (25.8) | MLCT<br>+ILCT |
|                       | <b>S<sub>16</sub></b> | 4.48 (0.0132)             | 277                  | HOMO-2 → LUMO+2 (36.5) | MLCT<br>+ILCT |
|                       |                       |                           |                      | HOMO → LUMO+6 (30.0)   |               |
|                       | <b>S<sub>17</sub></b> | 4.49 (0.0036)             | 276                  | HOMO-1 → LUMO+4 (43.9) | MLCT<br>+ILCT |
|                       | <b>S<sub>18</sub></b> | 4.50 (0.0317)             | 276                  | HOMO-1 → LUMO+4 (31.9) | MLCT<br>+ILCT |
|                       |                       |                           |                      | HOMO → LUMO+6 (43.3)   | MLCT<br>+ILCT |
| <b>S<sub>19</sub></b> | 4.52 (0.0121)         | 274                       | HOMO → LUMO+7 (60.5) | MLCT<br>+ILCT          |               |
| <b>S<sub>20</sub></b> | 4.56 (0.0042)         | 272                       | HOMO → LUMO+8 (70.0) | MLCT<br>+ILCT          |               |
| <b>S<sub>21</sub></b> | 4.57 (0.0079)         | 271                       | HOMO-4 → LUMO (86.8) | ILCT                   |               |

|                       |                       |                           |          |                        |                        |               |
|-----------------------|-----------------------|---------------------------|----------|------------------------|------------------------|---------------|
|                       | <b>S<sub>22</sub></b> | 4.60                      | (0.0306) | 269                    | HOMO-2 → LUMO+4 (45.3) | MLCT<br>+ILCT |
|                       | <b>S<sub>23</sub></b> | 4.62                      | (0.0079) | 268                    | HOMO-4 → LUMO+1 (46.7) | ILCT          |
|                       | <b>S<sub>24</sub></b> | 4.64                      | (0.0041) | 267                    | HOMO-3 → LUMO+1 (78.2) | ILCT          |
|                       | <b>S<sub>25</sub></b> | 4.67                      | (0.0003) | 266                    | HOMO-10 → LUMO (42.7)  | ILCT<br>+nπ*  |
|                       | <b>S<sub>26</sub></b> | 4.67                      | (0.0025) | 265                    | HOMO → LUMO+9 (56.2)   | MLCT<br>+ILCT |
|                       |                       | <b>E<sub>⊥</sub> (eV)</b> |          | <b>λ (nm)</b>          | <b>Assignments</b>     |               |
| <b>2</b>              | <b>S<sub>1</sub></b>  | 3.54                      | (0.0358) | 351                    | HOMO-1 → LUMO (14.8)   | MLCT<br>+ILCT |
|                       |                       |                           |          |                        | HOMO → LUMO (76.7)     | MLCT<br>+ILCT |
|                       | <b>S<sub>2</sub></b>  | 3.61                      | (0.0154) | 343                    | HOMO-1 → LUMO (74.2)   | MLCT<br>+ILCT |
|                       | <b>S<sub>3</sub></b>  | 3.86                      | (0.0268) | 321                    | HOMO-2 → LUMO (80.5)   | MLCT<br>+ILCT |
|                       | <b>S<sub>4</sub></b>  | 3.90                      | (0.0092) | 318                    | HOMO → LUMO+1 (95.9)   | MLCT<br>+ILCT |
|                       | <b>S<sub>5</sub></b>  | 4.04                      | (0.039)  | 307                    | HOMO → LUMO+2 (88.4)   | MLCT<br>+ILCT |
|                       | <b>S<sub>6</sub></b>  | 4.08                      | (0.0076) | 304                    | HOMO → LUMO+3 (83.2)   | MLCT<br>+ILCT |
|                       | <b>S<sub>7</sub></b>  | 4.11                      | (0.0524) | 302                    | HOMO → LUMO+4 (87.0)   | MLCT<br>+ILCT |
|                       | ...                   |                           |          |                        |                        |               |
|                       | <b>S<sub>18</sub></b> | 4.45                      | (0.0246) | 279                    | HOMO-2 → LUMO+3 (30.1) | MLCT<br>+ILCT |
|                       |                       |                           |          |                        | HOMO → LUMO+6 (26.6)   |               |
|                       | <b>S<sub>19</sub></b> | 4.47                      | (0.0409) | 278                    | HOMO → LUMO+6 (49.5)   | MLCT<br>+ILCT |
|                       | <b>S<sub>20</sub></b> | 4.48                      | (0.0096) | 276                    | HOMO-3 → LUMO+1 (61.8) | ILCT          |
|                       | <b>S<sub>21</sub></b> | 4.52                      | (0.006)  | 274                    | HOMO-2 → LUMO+4 (34.2) | MLCT<br>+ILCT |
| <b>S<sub>22</sub></b> | 4.53                  | (0.0067)                  | 274      | HOMO → LUMO+8 (49.2)   | MLCT<br>+ILCT          |               |
| <b>S<sub>23</sub></b> | 4.57                  | (0.0266)                  | 271      | HOMO-2 → LUMO+4 (41.3) | MLCT<br>+ILCT          |               |
| <b>S<sub>24</sub></b> | 4.64                  | (0.0151)                  | 267      | HOMO-3 → LUMO+4 (31.0) | ILCT                   |               |

**Table S8.** Vertical Emission Energies ( $E_{\perp}$ , eV), Oscillator Strengths ( $f$ ), Wavelength (nm) and Singly Occupied Orbitals Involved in the  $S_1 \rightarrow S_0$  and  $T_1 \rightarrow S_0$  Electronic Transitions in the Gas Phase, Solution, and Crystal.

| Gas      |       |                  |          |                |                                |               |
|----------|-------|------------------|----------|----------------|--------------------------------|---------------|
|          |       | $E_{\perp}$ (eV) |          | $\lambda$ (nm) | Assignments                    |               |
| 1        | $S_1$ | 2.14             | (0.0072) | 578            | HOMO $\rightarrow$ LUMO (97.9) | MLCT<br>+ILCT |
|          | $T_1$ | 2.05             | (0.0000) | 603            | HOMO $\rightarrow$ LUMO (96.9) | MLCT<br>+ILCT |
| 2        | $S_1$ | 2.13             | (0.0072) | 583            | HOMO $\rightarrow$ LUMO (97.9) | MLCT<br>+ILCT |
|          | $T_1$ | 2.04             | (0.0000) | 609            | HOMO $\rightarrow$ LUMO (96.9) | MLCT<br>+ILCT |
| Solution |       |                  |          |                |                                |               |
|          |       | $E_{\perp}$ (eV) |          | $\lambda$ (nm) | Assignments                    |               |
| 1        | $S_1$ | 2.17             | (0.0163) | 571            | HOMO $\rightarrow$ LUMO (97.9) | MLCT<br>+ILCT |
|          | $T_1$ | 2.07             | (0.0000) | 599            | HOMO $\rightarrow$ LUMO (96.5) | MLCT<br>+ILCT |
| 2        | $S_1$ | 2.16             | (0.0170) | 573            | HOMO $\rightarrow$ LUMO (97.8) | MLCT<br>+ILCT |
|          | $T_1$ | 2.07             | (0.0000) | 600            | HOMO $\rightarrow$ LUMO (96.4) | MLCT<br>+ILCT |
| Crystal  |       |                  |          |                |                                |               |
|          |       | $E_{\perp}$ (eV) |          | $\lambda$ (nm) | Assignments                    |               |
| 1        | $S_1$ | 2.28             | (0.0070) | 545            | HOMO $\rightarrow$ LUMO (96.6) | MLCT<br>+ILCT |
|          | $T_1$ | 2.20             | (0.0000) | 564            | HOMO $\rightarrow$ LUMO (95.0) | MLCT<br>+ILCT |
| 2        | $S_1$ | 2.44             | (0.0043) | 509            | HOMO $\rightarrow$ LUMO (94.1) | MLCT<br>+ILCT |
|          | $T_1$ | 2.33             | (0.0000) | 531            | HOMO $\rightarrow$ LUMO (90.0) | MLCT<br>+ILCT |

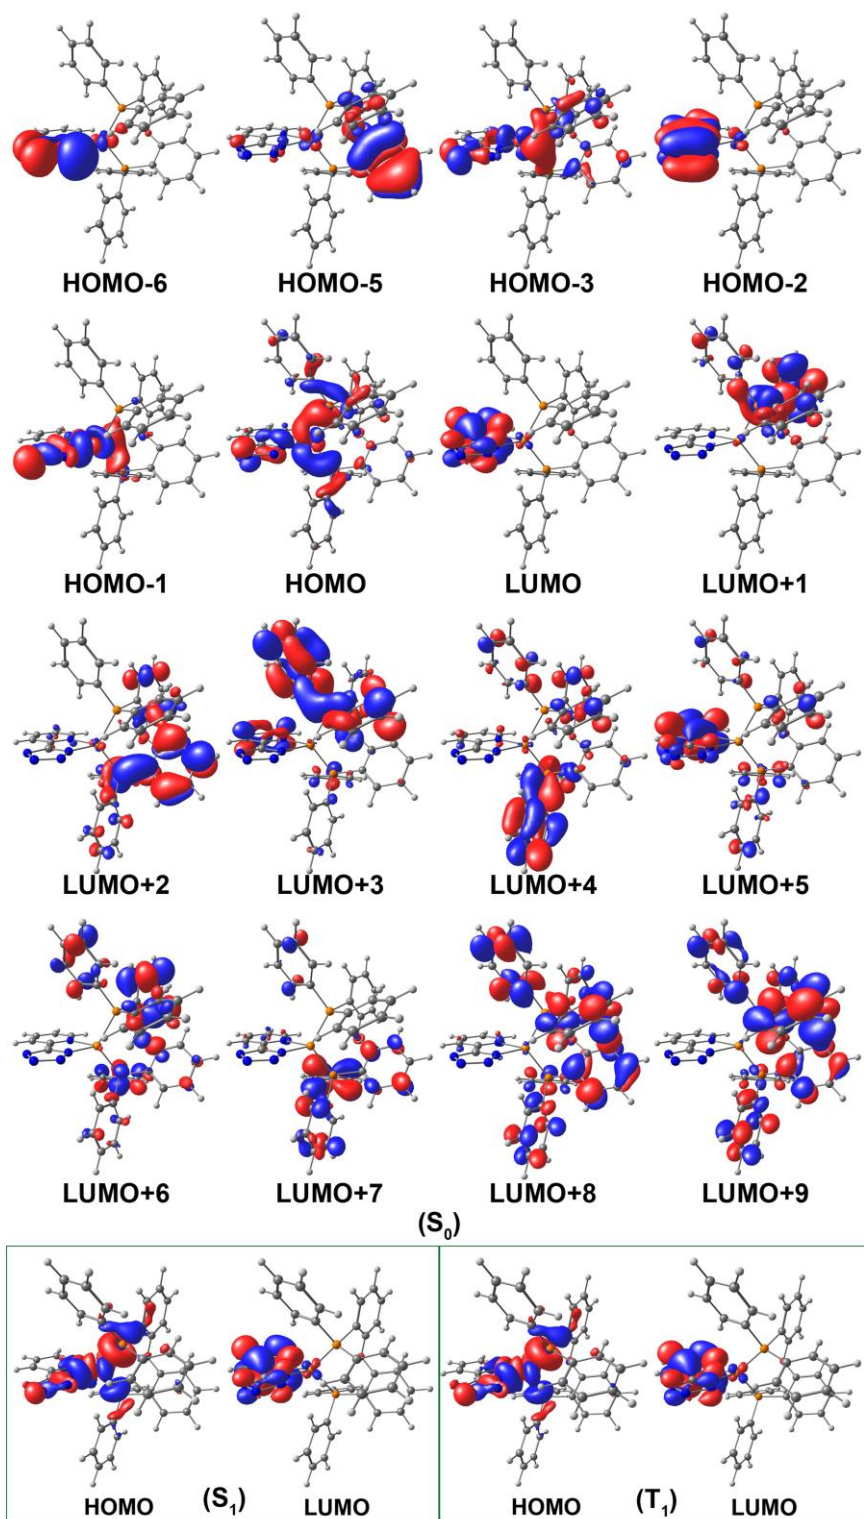

**Figure S13.** TD-DFT computed canonical molecular orbitals at the S<sub>0</sub>, S<sub>1</sub> and T<sub>1</sub> minima of compound **1** in gas phase.

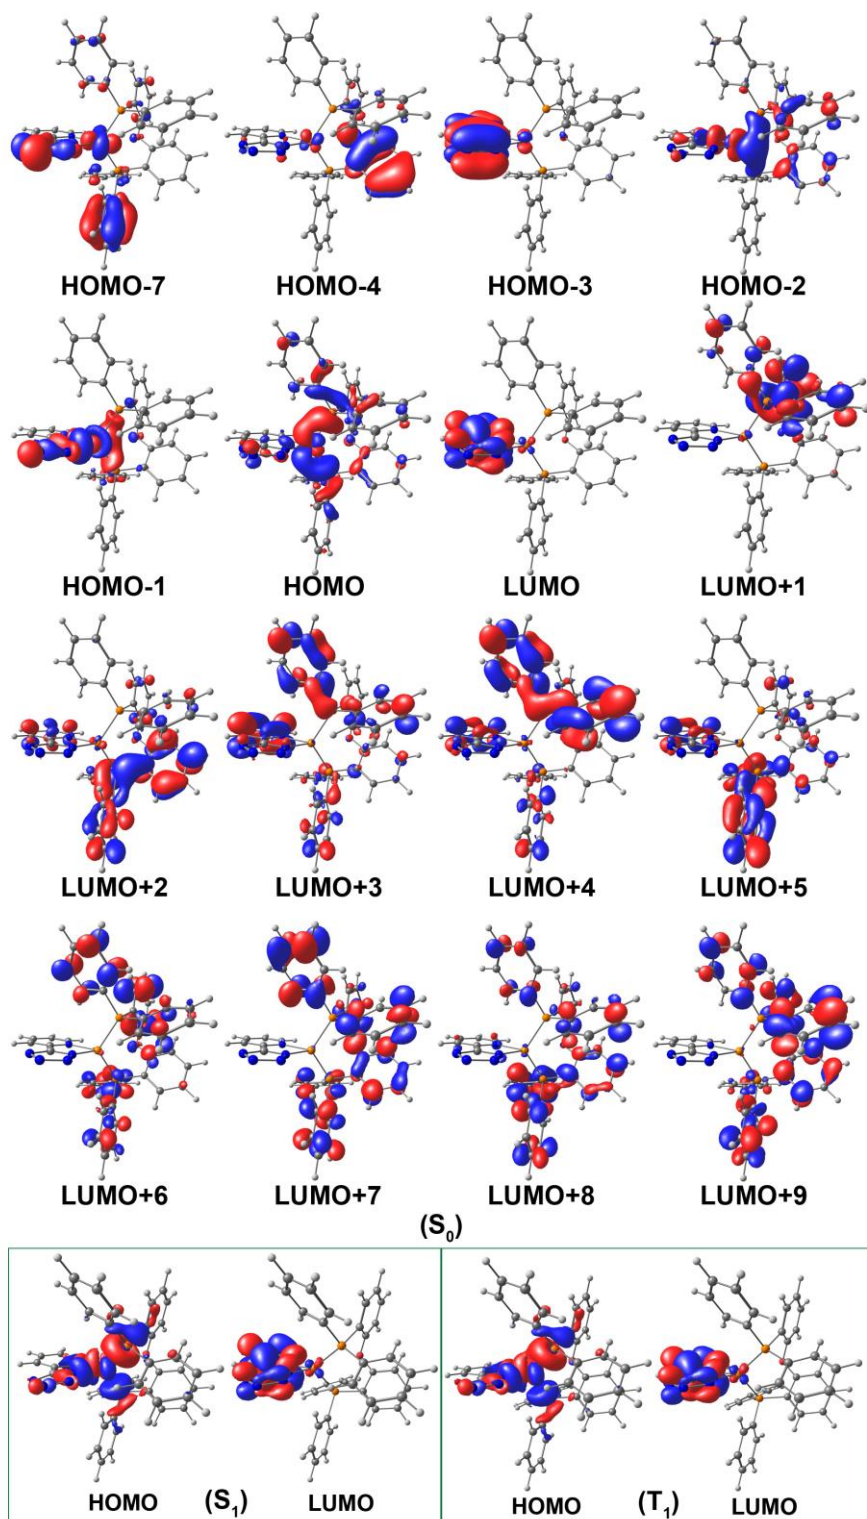

**Figure S14.** TD-DFT computed canonical molecular orbitals at the S<sub>0</sub>, S<sub>1</sub> and T<sub>1</sub> minima of compound **1** in solution.



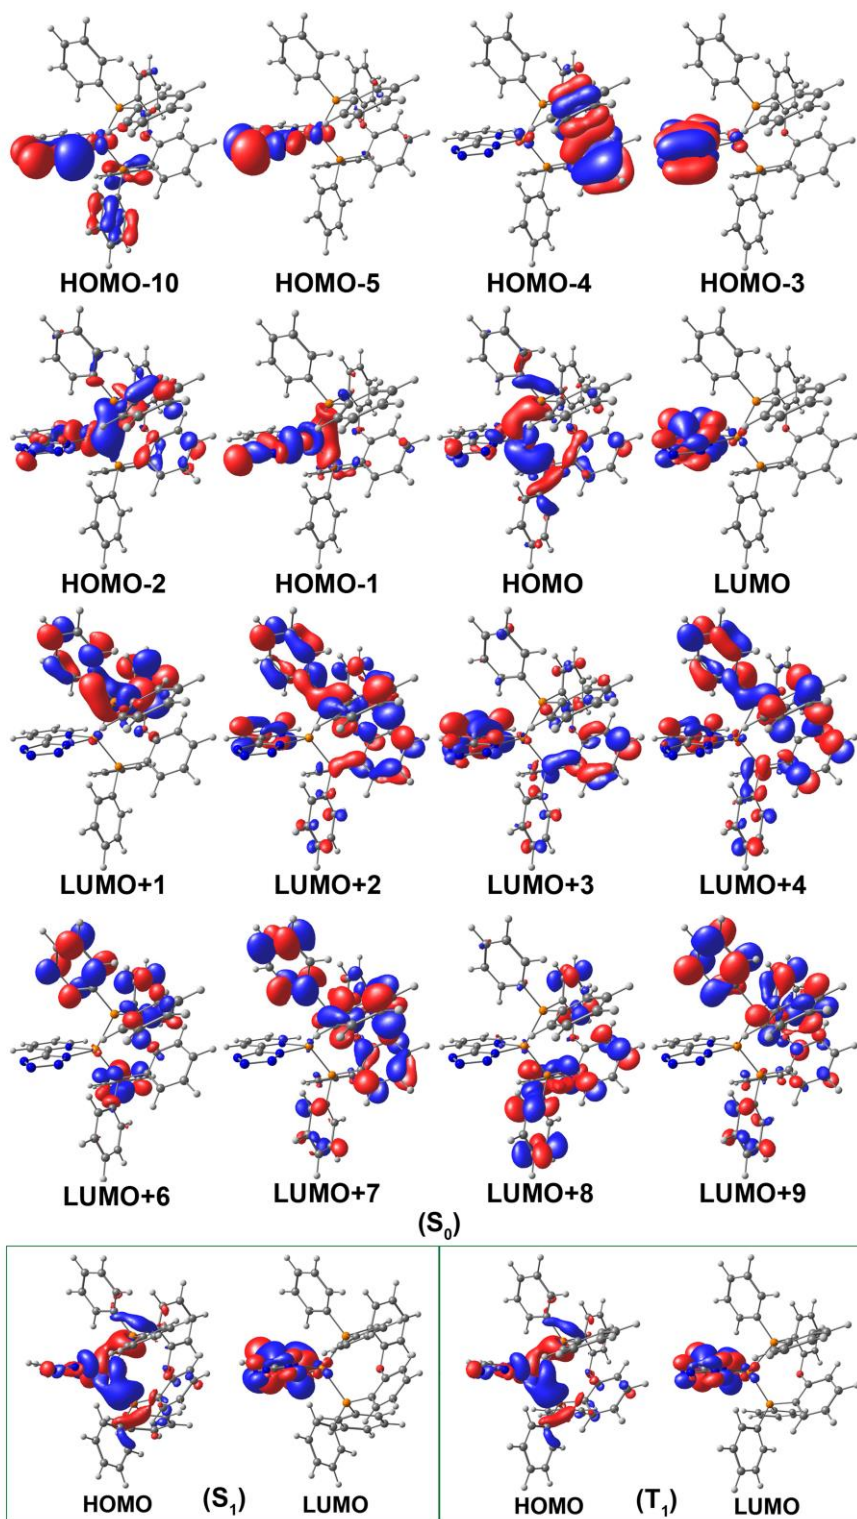

**Figure S15.** TD-DFT computed canonical molecular orbitals at the S<sub>0</sub>, S<sub>1</sub> and T<sub>1</sub> minima of compound **1** in crystal.

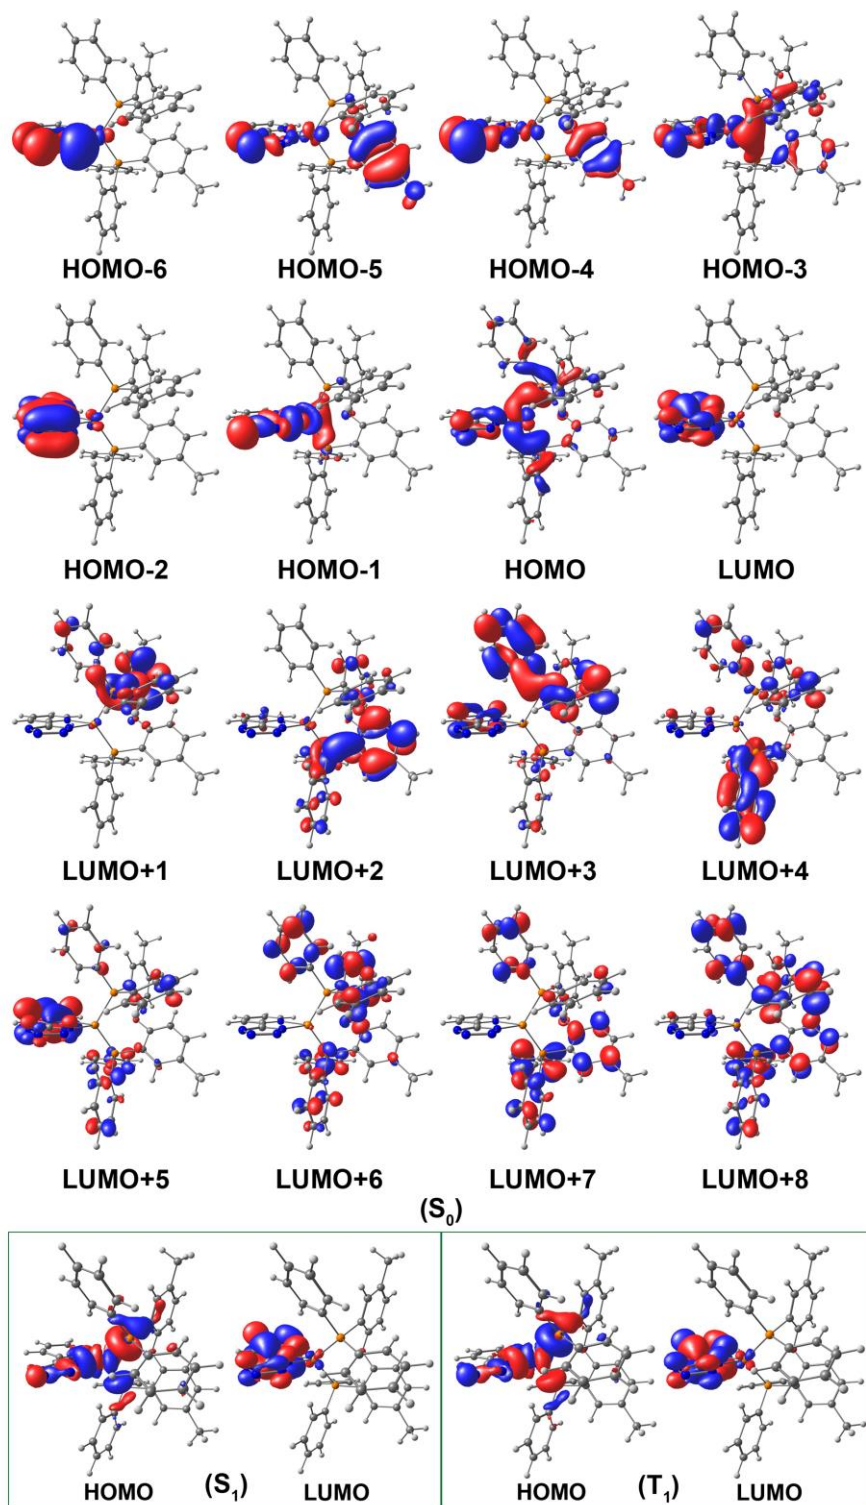

**Figure S16.** TD-DFT computed canonical molecular orbitals at the S<sub>0</sub>, S<sub>1</sub> and T<sub>1</sub> minima of compound **2** in gas phase.

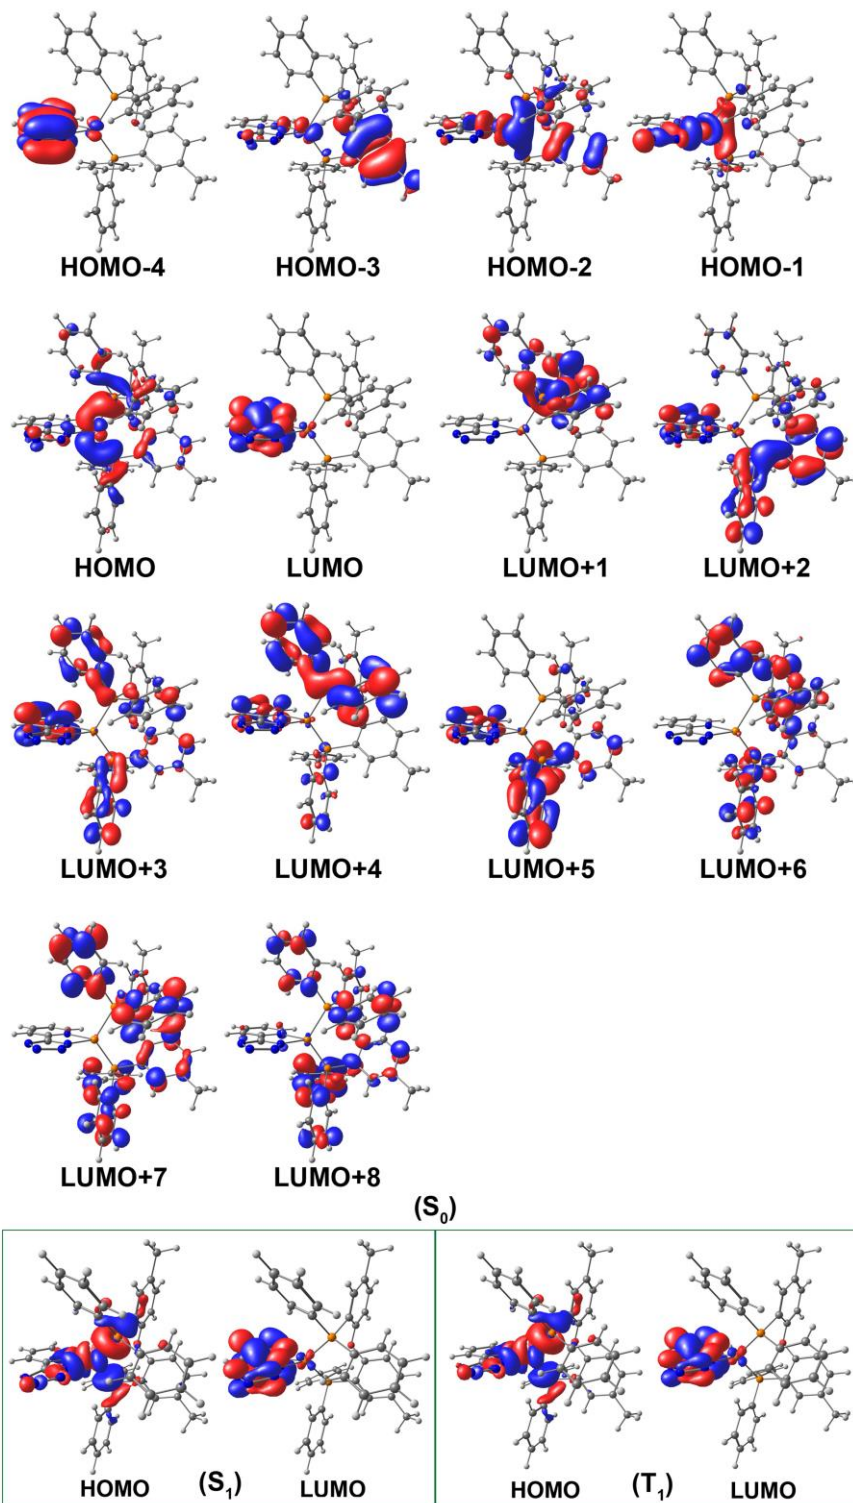

**Figure S17.** TD-DFT computed canonical molecular orbitals at the S<sub>0</sub>, S<sub>1</sub> and T<sub>1</sub> minima of compound **2** in solution.

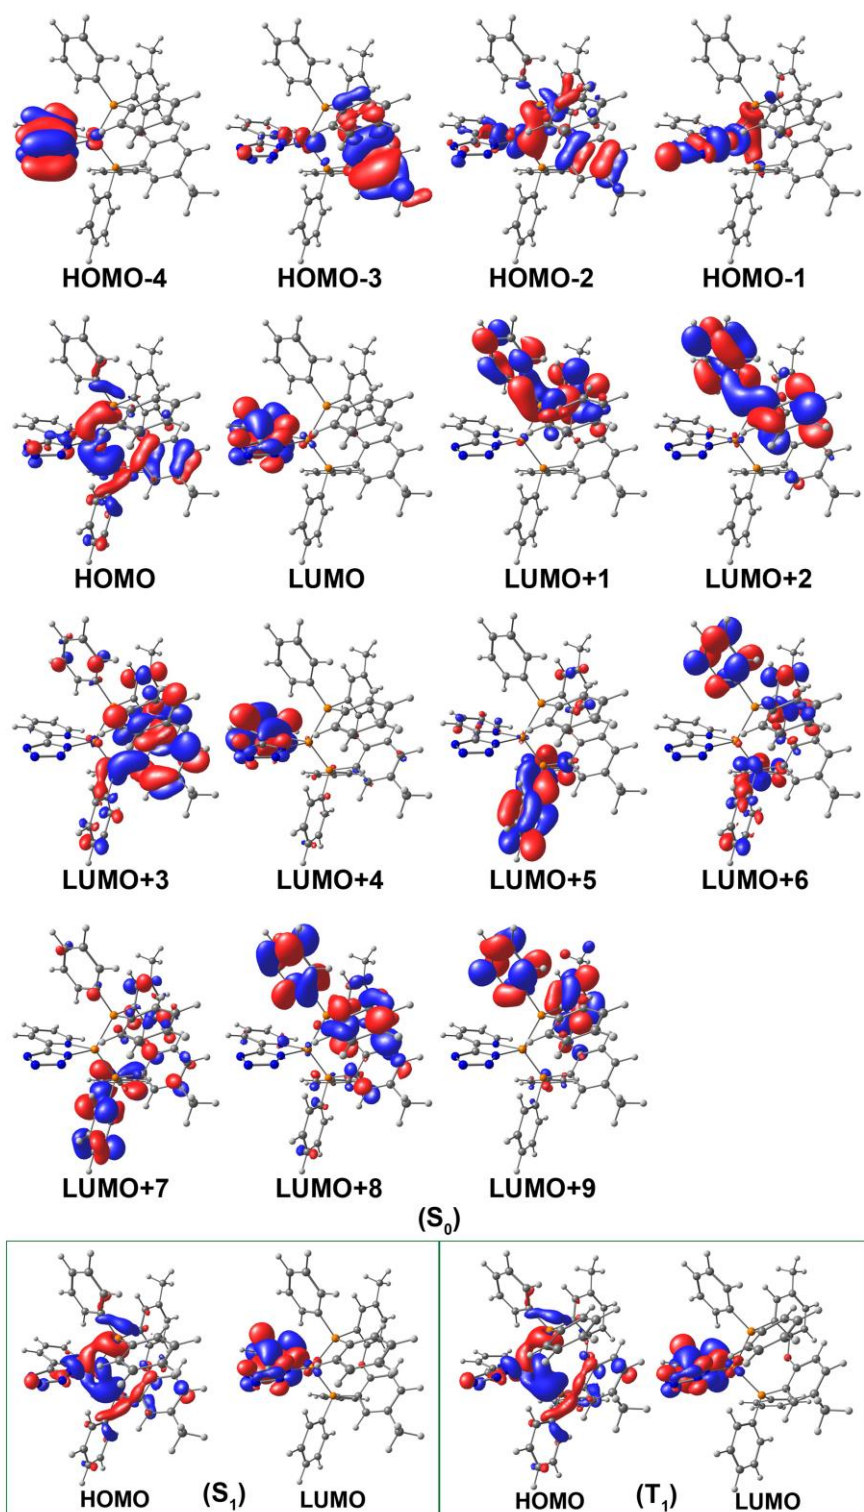

**Figure S18.** TD-DFT computed canonical molecular orbitals at the S<sub>0</sub>, S<sub>1</sub> and T<sub>1</sub> minima of compound **2** in crystal.

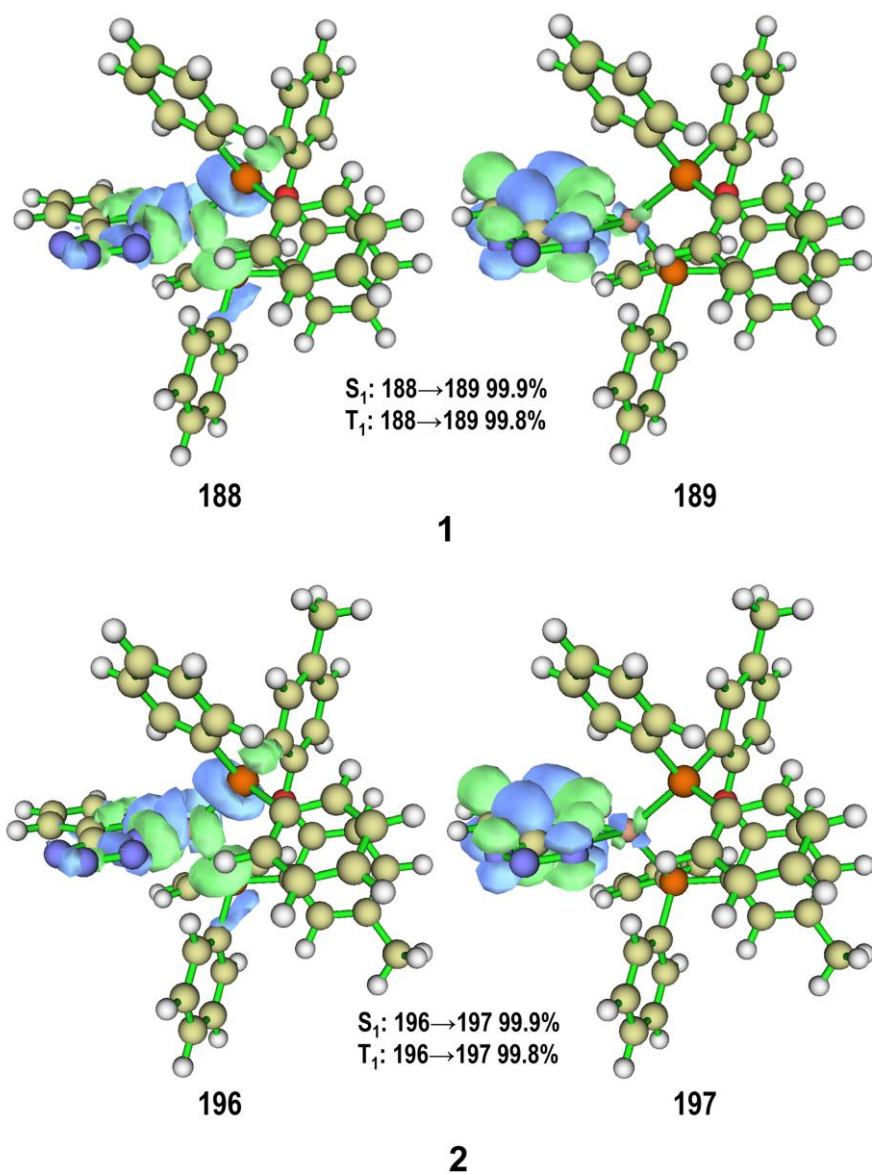

**Figure S19.** Natural transition orbital pairs at the S<sub>1</sub> and T<sub>1</sub> minima of compound **1** and **2** calculated using the Multiwfn package<sup>2</sup>.

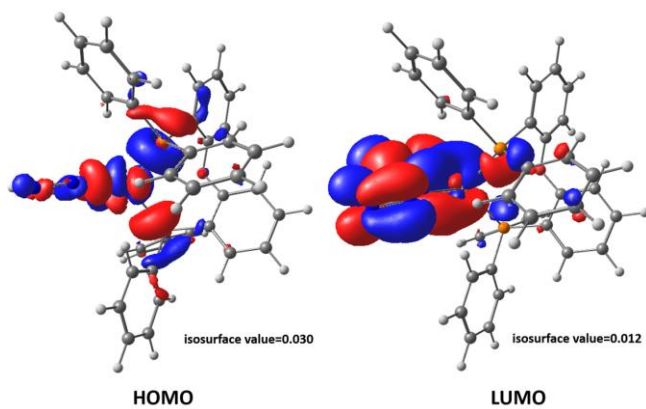

**Figure S20.** TD-DFT computed HOMO and LUMO at the S<sub>1</sub> minima of compound **1** in solution.

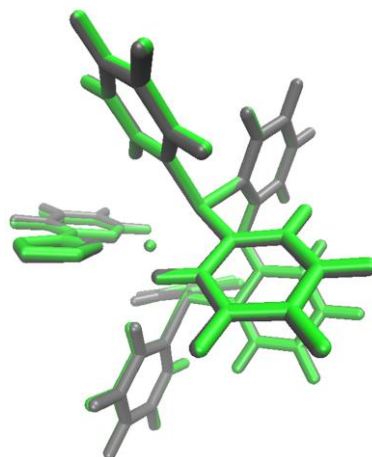

**Figure S21.** Overlays of  $S_1$  (gray) and  $T_1$  (green) structures in solution for complex **1**.

### References

1. L. Bergmann, J. Friedrichs, M. Mydlak, T. Baumann, M. Nieger and S. Bräse, *Chem. Commun.* 2013, **49**, 6501.
2. T. Lu and F. Chen, *J. Comput. Chem.*, 2012, **33**, 580.
